# Supplementary material
Source: Royal Society of Chemistry journal article supplement (doi:10.1039/d5ta10451c)
Supplement: d5ta10451c1.pdf [file d5ta10451c1.pdf]

## Supporting Information

for

### **Rational core-shell design of novel Ni-Co bimetallic MOF@PBA and $Al_xV_2O_5@C$ as positive and negative electrode materials for high-performance aqueous Zn-ion hybrid supercapacitors**

Nandini Barman<sup>a†</sup>, Prakash Kumar Mondal<sup>b†</sup>, Pulak Pradhan<sup>b</sup>, Deyashi Sarkar<sup>a</sup>, Shreya Dan<sup>a</sup>, Nirjhar Chakraborty<sup>a</sup>, Pallav Mondal<sup>b</sup>, Dudekula Khasim Vali<sup>b</sup>, Joydeep Ray<sup>c</sup>, Yogesh Kumar<sup>d</sup>, Utpal Adhikari<sup>b</sup>, Milan Maji<sup>b</sup>, Subhradeep Mistry<sup>e</sup>, Sourav Laha<sup>b\*</sup> and Anjan Banerjee<sup>a\*</sup>

<sup>a</sup> Department of Chemistry, Presidency University, Kolkata, 86/1 College Street, Kolkata-700073, India

<sup>b</sup> Department of Chemistry, National Institute of Technology Durgapur, Durgapur-713209, India

<sup>c</sup> Department of Chemistry, Indian Institute of Technology Patna, Bihar-801106, India

<sup>d</sup> Department of Chemistry, Miranda House, University of Delhi, Delhi-110007, India

<sup>e</sup> Department of Chemistry, Hemvati Nandan Bahuguna Garhwal University, Tehri, Uttarakhand-249199, India

\*[slaha.ch@nitdgp.ac.in](mailto:slaha.ch@nitdgp.ac.in) & [anjan.chem@presiuniv.ac.in](mailto:anjan.chem@presiuniv.ac.in)

† These authors contributed equally to this work as co-first authors.

| <b>Contents</b>                                                                                                                   | <b>Page No.</b> |
|-----------------------------------------------------------------------------------------------------------------------------------|-----------------|
| <b>Section S1:</b> Synthesis of Prussian Blue Analogues (PBAs)                                                                    | S3              |
| <b>Section S2:</b> Methodology for calculating diffusion coefficient (D) from EIS data                                            | S4              |
| <b>Table S1:</b> Literature survey and comparative analysis of capacitive performances for Zn-ion hybrid supercapacitors          | S4-S6           |
| <b>Table S2:</b> Crystal Data and Structure Refinement Parameters                                                                 | S7              |
| <b>Table S3:</b> Bond length (M-O) data of NCBMOF-11                                                                              | S8              |
| <b>Table S4:</b> Bond angle (M-O-M) data of NCBMOF-11                                                                             | S8              |
| <b>Table S5:</b> Crystal lattice parameters and CCDC numbers for the reported MOFs with BTC linker                                | S8-S11          |
| <b>Table S6:</b> ICP-OES results of NCBMOF-11, NCBMOF-12, and NCBMOF-21                                                           | S11             |
| <b>Table S7:</b> Rietveld refinement parameters of NCBMOF@PBA-21 and AIVO                                                         | S11-S12         |
| <b>Table S8:</b> $R_s$ and $R_{CT}$ data for NCBMOF-12 and NCBMOF@PBA-12 positive electrodes at before and after cycling test     | S12             |
| <b>Table S9:</b> $R_s$ and $R_{CT}$ data for AIVO and AIVO@C negative electrodes at before and after cycling test                 | S12             |
| <b>Table S10:</b> $R_s$ and $R_{CT}$ data for NCBMOF@PBA-12//AIVO@C full cells at before and after cycling test                   | S12             |
| <b>Figure S1.</b> Asymmetric unit of NCBMOF-11                                                                                    | S13             |
| <b>Figure S2:</b> (a) 2D layer and (b) view of 2D layers along the crystallographic a-axis of NCBMOF-11                           | S14             |
| <b>Figure S3:</b> PXRD refinement plot of (a) NCBMOF-11 and (b) NCBMOF-21                                                         | S15             |
| <b>Figure S4:</b> (a) CHNS and (b) oxygen analysis data of NCBMOF-11                                                              | S16             |
| <b>Figure S5:</b> PXRD plots of AIVO and AIVO@C                                                                                   | S17             |
| <b>Figure S6:</b> FESEM-EDX data of NCBMOF-11                                                                                     | S18             |
| <b>Figure S7:</b> FESEM-EDX data of NCBMOF-12                                                                                     | S19             |
| <b>Figure S8:</b> HAADF-STEM EDX data of NCBMOF-12                                                                                | S20             |
| <b>Figure S9:</b> FESEM-EDX data of NCBMOF-21                                                                                     | S21             |
| <b>Figure S10:</b> FESEM-EDX data of NCBMOF@PBA-12                                                                                | S22             |
| <b>Figure S11:</b> HAADF-STEM EDX data of NCBMOF@PBA-12                                                                           | S23             |
| <b>Figure S12:</b> FESEM-EDX data of AIVO                                                                                         | S24             |
| <b>Figure S13:</b> FESEM-EDX data of AIVO@C                                                                                       | S25             |
| <b>Figure S14:</b> HAADF-STEM EDX data of AIVO                                                                                    | S26             |
| <b>Figure S15:</b> HAADF-STEM EDX data of AIVO@C                                                                                  | S27             |
| <b>Figure S16:</b> HRTEM images showing lattice fringes: (a) NCBMOF@PBA-12 and (b) AIVO@C                                         | S28             |
| <b>Figure S17:</b> Pore size distribution plots of (a) NCBMOF-12 and (b) NCBMOF@PBA-12                                            | S28             |
| <b>Figure S18:</b> Raman spectra of NCBMOF-11, NCBMOF-12 and NCBMOF-21                                                            | S29             |
| <b>Figure S19:</b> C 1s deconvoluted spectra of NCBMOF-12 and NCBMOF@PBA-12                                                       | S30             |
| <b>Figure S20:</b> C 1s deconvoluted spectra of AIVO@C                                                                            | S30             |
| <b>Figure S21:</b> CV of (a) NCBMOF-11, (b) NCBMOF-21; b-value calculation of (c) NCBMOF-11, (d) NCBMOF-21                        | S31             |
| <b>Figure S22:</b> CV profiles of (a) PBA-11, (b) PBA-12, (c) PBA-21; b-value calculations for (d) PBA-11, (e) PBA-12, (f) PBA-21 | S32             |
| <b>Figure S23:</b> CV of (a) NCBMOF@PBA-11, (b) NCBMOF@PBA-21; b-value calculation of (c) NCBMOF@PBA-11, (d) NCBMOF@PBA-21        | S33             |
| <b>Figure S24:</b> b-value calculation of (a) NCBMOF-12, (b) NCBMOF@PBA-12, (c) AIVO, (d) AIVO@C                                  | S34             |

|                                                                                                                                                                                                                                          |         |
|------------------------------------------------------------------------------------------------------------------------------------------------------------------------------------------------------------------------------------------|---------|
| <b>Figure S25:</b> GCD of (a) NCBMOF-11, (b) NCBMOF-21, (c) comparison of rate capability among three compositions namely NCBMOF-11, NCBMOF-12 and NCBMOF-21                                                                             | S365    |
| <b>Figure S26:</b> GCD of (a) PBA-11, (b) PBA-12, (c) PBA-21, (d) comparison of rate capability among three compositions                                                                                                                 | S36     |
| <b>Figure S27:</b> GCD of (a) NCBMOF@PBA-11, (b) NCBMOF@PBA-21, (c) comparison of rate capability among three compositions namely NCBMOF@PBA-11, NCBMOF@PBA-12 and NCBMOF@PBA-21                                                         | S37     |
| <b>Figure S28:</b> ex situ XPS analysis of NCBMOF@PBA-12 at its charged and discharged states: (a) Ni 2p, (b) Co 2p, and (c) Fe 2p spectra                                                                                               | S38     |
| <b>Figure S29:</b> Nyquist plots at before and after cycling: (a) NCBMOF-12 and (b) NCBMOF@PBA-12                                                                                                                                        | S39     |
| <b>Figure S30:</b> ex situ XPS analysis of AIVO at charged and discharged states                                                                                                                                                         | S39     |
| <b>Figure S31:</b> Nyquist plots at before and after cycling: (a) AIVO and (b) AIVO@C                                                                                                                                                    | S40     |
| <b>Figure S32:</b> SEM images comparing the surface morphologies of AIVO and AIVO@C negative electrodes in their initial pristine state and after prolonged electrochemical cycling (50,000 CV at a scan rate of 25 mV s <sup>-1</sup> ) | S40-S41 |
| <b>Figure S33:</b> GCD profiles of the NCBMOF@PBA-12//AIVO@C full cells under (a) 0-1.2 V and (b) 0-1.8 V window                                                                                                                         | S41     |
| <b>Figure S34:</b> Nyquist plots at before and after full cell cycling at variable voltage regime: (a) 0-1.2 V, (b) 0-1.5 V and (c) 0-1.8 V                                                                                              | S41     |
| <b>Figure S35:</b> Surface morphology of NCBMOF@PBA-12 positive and AIVO@C negative electrodes at before and after cycling test @ 1 A g <sup>-1</sup>                                                                                    | S42     |
| <b>Figure S36:</b> Comparative PXRD patterns of pristine active material and corresponding cycled electrodes (@ 1 A g <sup>-1</sup> )                                                                                                    | S43     |
| <b>References</b>                                                                                                                                                                                                                        | S44     |

**Section S1. Synthesis of Prussian Blue Analogues (PBAs):** Three NiCo-PBAs with different Ni/Co ratios were synthesized using the same citrate-assisted crystallization route.<sup>S1</sup> For K<sub>2</sub>Ni<sub>0.5</sub>Co<sub>0.5</sub>Fe(CN)<sub>6</sub> (PBA-11), 2.5 mmol CoCl<sub>2</sub>, 2.5 mmol NiCl<sub>2</sub>, and 5 mmol trisodium citrate were dissolved in 50 mL of DI water. In a separate beaker, 5 mmol K<sub>4</sub>[Fe(CN)<sub>6</sub>] was dissolved in 50 mL deionized (DI) water. The two solutions were then simultaneously added dropwise into 100 mL DI water and stirred for 2 h at room temperature. The resulting olive-green precipitate was collected by centrifugation (5000 rpm, 30 min), thoroughly washed with DI water and ethanol, and dried at 70 °C for 8 h. However, the PBA-12 (Ni:Co = 1:2) and PBA-21 (Ni:Co = 2:1) were prepared following the same procedure by adjusting the Ni and Co precursor ratios accordingly.

**Section S2. Methodology for calculating diffusion coefficient (D) from EIS data:** The lower-frequency Warburg component of the Nyquist plot is used to estimate the diffusion coefficient (D) of Zn<sup>2+</sup> ions within the bulk of electrode. The formula for determining D is provided in **Eq. S1**.<sup>S2</sup>

$$D = 0.5 \times R^2 \times T^2 \times A^{-2} \times n^{-4} \times F^{-4} \times C^{-2} \times \sigma^{-2} \dots\dots\dots (\text{Eq. S1})$$

where R is the universal gas constant, T is the absolute temperature, A is the electrode's geometric area, n is the number of electrons transferred per molecule during oxidation and reduction, F is the Faraday constant, C is the molar concentration of Zn<sup>2+</sup> ions (mol cm<sup>-3</sup>), and σ is the Warburg factor, which relates to the real component of impedance (Z') via the following **Eq. S2**:

$$Z' = R_s + R_{CT} + \sigma \omega^{-1/2} \dots\dots\dots (\text{Eq. S2})$$

where ω represents the frequency in the EIS measurement. The linear dependence of Z' on ω<sup>-1/2</sup> indicates Warburg-type diffusion behaviour. From this plot, the slope represents the Warburg factor (σ), whereas the intercept corresponds to the combined resistance of the solution R<sub>s</sub> and R<sub>CT</sub>.

**Supporting Tables**

**Table S1:** Literature survey and comparative analysis of capacitive performances for Zn-ion hybrid supercapacitors.

| Sr | Positive Electrode              | Negative Electrode | Electrolyte                                       | Performances                                                                                                                                                                                                                                       | Ref |
|----|---------------------------------|--------------------|---------------------------------------------------|----------------------------------------------------------------------------------------------------------------------------------------------------------------------------------------------------------------------------------------------------|-----|
| 1  | N, P, O co-doped carbon         | Zn                 | ZnSO <sub>4</sub>                                 | 215.2 F g <sup>-1</sup> @ 0.1 A g <sup>-1</sup> within 0.2-1.8 V; 54.4 Wh kg <sup>-1</sup> @ 4000 W kg <sup>-1</sup> ; ~100% capacitance retention over 10,000 cycles @ 5 A g <sup>-1</sup> .                                                      | S3  |
| 2  | MOF derived porous carbon (MPC) | Zn                 | Zn(CF <sub>3</sub> SO <sub>3</sub> ) <sub>2</sub> | 289.2 F g <sup>-1</sup> @ 0.2 A g <sup>-1</sup> within 0-1.8 V; 130.1 Wh kg <sup>-1</sup> @ 180.3 W kg <sup>-1</sup> ; 7.8 kW kg <sup>-1</sup> @ 56 Wh kg <sup>-1</sup> ; 96.7% capacitance retention after 10,000 cycles @ 10 A g <sup>-1</sup> . | S4  |

|    |                                                         |                                                        |                                                   |                                                                                                                                                                                                                                                         |     |
|----|---------------------------------------------------------|--------------------------------------------------------|---------------------------------------------------|---------------------------------------------------------------------------------------------------------------------------------------------------------------------------------------------------------------------------------------------------------|-----|
| 3  | Reduced graphene oxide (rGO)                            | Zn                                                     | ZnSO <sub>4</sub>                                 | 277 F g <sup>-1</sup> & 75.4 Wh kg <sup>-1</sup> @ 1 mV s <sup>-1</sup> within 0.2-1.6 V; 97.8% capacitance retention over 20,000 cycles @ 2.5 A g <sup>-1</sup> .                                                                                      | S5  |
| 4  | N, S co-doped porous carbons (NSPCs)                    | Zn                                                     | Zn(CF <sub>3</sub> SO <sub>3</sub> ) <sub>2</sub> | 273 F g <sup>-1</sup> @ 0.1 A g <sup>-1</sup> within 0-1.8 V; 122.6 Wh kg <sup>-1</sup> @ 58.3 W kg <sup>-1</sup> ; 14.46 kW kg <sup>-1</sup> @ 77.9 Wh kg <sup>-1</sup> ; 99.5% capacitance retention after 15,000 cycles @ 5 A g <sup>-1</sup> .      | S6  |
| 5  | MnO <sub>2</sub> -CNT                                   | MXene (Ti <sub>3</sub> C <sub>2</sub> T <sub>x</sub> ) | ZnSO <sub>4</sub> + MnSO <sub>4</sub>             | 115.1 F g <sup>-1</sup> @ 1 mV s <sup>-1</sup> within 0-0.8 V; 98.6 Wh kg <sup>-1</sup> @ 77.5 W kg <sup>-1</sup> ; 2480.6 W kg <sup>-1</sup> @ 29.7 Wh kg <sup>-1</sup> ; 83.6% capacitance retention after 15,000 cycles @ 5.2 A g <sup>-1</sup> .    | S7  |
| 6  | Ti <sub>3</sub> C <sub>2</sub>                          | Zn                                                     | ZnSO <sub>4</sub>                                 | 132 F g <sup>-1</sup> @ 0.5 A g <sup>-1</sup> within 0.1-1.35 V; 82.5% capacitance retention after 1,000 cycles @ 3 A g <sup>-1</sup> .                                                                                                                 | S8  |
| 7  | N-Ti <sub>3</sub> C <sub>2</sub>                        | Zn                                                     | ZnSO <sub>4</sub>                                 | 247.9 F g <sup>-1</sup> @ 0.1 A g <sup>-1</sup> within 0.05-1.2 V; 45.54 Wh kg <sup>-1</sup> @ 70 W kg <sup>-1</sup> ; 4093 W kg <sup>-1</sup> @ 30.99 Wh kg <sup>-1</sup> ; 88.34% capacitance retention after 6,000 cycles @ 1.5 A g <sup>-1</sup> .  | S9  |
| 8  | TiN                                                     | Zn                                                     | ZnSO <sub>4</sub>                                 | 489.8 F g <sup>-1</sup> @ 0.2 A g <sup>-1</sup> within 0.1-1.9 V; 135 Wh kg <sup>-1</sup> @ 186 W kg <sup>-1</sup> ; 3472 W kg <sup>-1</sup> @ 56 Wh kg <sup>-1</sup> ; ~78 % capacitance retention after 10,000 cycles @ 1 A g <sup>-1</sup> .         | S10 |
| 9  | Molten salt assisted pitch derived porous carbon (MSPC) | Zn                                                     | ZnSO <sub>4</sub>                                 | 136.5 F g <sup>-1</sup> @ 0.68 A g <sup>-1</sup> within 0-1.8 V; 36.5 Wh kg <sup>-1</sup> @ 376.6 W kg <sup>-1</sup> ; 3.2 kW kg <sup>-1</sup> @ 22.7 Wh kg <sup>-1</sup> ; 85.4 % capacitance retention after 10,000 cycles @ 5.44 A g <sup>-1</sup> . | S11 |
| 10 | Cross-linked N & P co-incorporated                      | Zn                                                     | ZnSO <sub>4</sub>                                 | 233 F g <sup>-1</sup> @ 0.5 A g <sup>-1</sup> within 0.2-1.8 V; 81.1 Wh kg <sup>-1</sup> @ 80 W kg <sup>-1</sup> ;                                                                                                                                      | S12 |

|    |                                                                                            |                                                    |                                       |                                                                                                                                                                                                                                                     |                  |
|----|--------------------------------------------------------------------------------------------|----------------------------------------------------|---------------------------------------|-----------------------------------------------------------------------------------------------------------------------------------------------------------------------------------------------------------------------------------------------------|------------------|
|    | porous carbon nanosheets                                                                   |                                                    |                                       | 13.36 kW kg <sup>-1</sup> @ 40 Wh kg <sup>-1</sup> ; 101.8% capacitance retention after 10,000 cycles @ 5 A g <sup>-1</sup> .                                                                                                                       |                  |
| 11 | Carbon cloth@ZIF-8                                                                         | Zn                                                 | ZnSO <sub>4</sub>                     | 302 F g <sup>-1</sup> @ 0.5 A g <sup>-1</sup> within 0.2-1.8 V; 107.4 Wh kg <sup>-1</sup> @ 0.4 kW kg <sup>-1</sup> ; 16.2 kW kg <sup>-1</sup> @ 65.9 Wh kg <sup>-1</sup> ; ~100% capacitance retention after 10,000 cycles @ 1 A g <sup>-1</sup> . | S13              |
| 12 | Poly(3,4-ethylenedioxythiophene) coated Na <sub>0.55</sub> MnO <sub>2</sub> @ carbon cloth | Polyimide @MWCNT                                   | ZnSO <sub>4</sub>                     | 110.7 F g <sup>-1</sup> @ 5 mV s <sup>-1</sup> within 0-2 V; 10.7 Wh kg <sup>-1</sup> @ 192.2 W kg <sup>-1</sup> ; 1000 W kg <sup>-1</sup> @ 6 Wh kg <sup>-1</sup> ; 82.1% capacitance retention after 2,000 cycles @ 15 mV s <sup>-1</sup> .       | S14              |
| 13 | Na <sub>0.11</sub> MnO <sub>2</sub> /graphene                                              | Activated Carbon                                   | ZnSO <sub>4</sub> + MnSO <sub>4</sub> | 165 F g <sup>-1</sup> @ 0.5 A g <sup>-1</sup> within 0-1.8 V; 74.3 Wh kg <sup>-1</sup> @ 455.7 W kg <sup>-1</sup> ; 9.6 kW kg <sup>-1</sup> @ 18 Wh kg <sup>-1</sup> ; 83% capacitance retention after 5,000 cycles @ 1 A g <sup>-1</sup> .         | S15              |
| 14 | rGO-V <sub>2</sub> O <sub>5</sub>                                                          | rGO-MXene                                          | ZnSO <sub>4</sub>                     | 175 F g <sup>-1</sup> @ 0.5 mV s <sup>-1</sup> within 0-1.6 V; 107.2 Wh kg <sup>-1</sup> @ 321.6 W kg <sup>-1</sup> ; 2780 W kg <sup>-1</sup> @ 61.4 Wh kg <sup>-1</sup> ; 81% capacitance retention after 10,000 cycles @ 0.2 A g <sup>-1</sup> .  | S16              |
| 15 | CNTs@MnO <sub>2</sub>                                                                      | Nb <sub>2</sub> CT <sub>x</sub>                    | ZnSO <sub>4</sub> + MnSO <sub>4</sub> | 192.8 F g <sup>-1</sup> @ 1 mV s <sup>-1</sup> within 0-1.8 V; 96.7 Wh kg <sup>-1</sup> @ 183.2 W kg <sup>-1</sup> ; 1156.3 W kg <sup>-1</sup> @ 61 Wh kg <sup>-1</sup> ; 88.7% capacitance retention after 10,000 cycles @ 2 A g <sup>-1</sup> .   | S17              |
| 16 | <b>NCB MOF@PBA-12</b>                                                                      | <b>Al<sub>x</sub>V<sub>2</sub>O<sub>5</sub> @C</b> | <b>ZnSO<sub>4</sub></b>               | <b>450 F g<sup>-1</sup> @ 1 A g<sup>-1</sup> within 0-1.8 V, 203 Wh kg<sup>-1</sup> @ 900 W kg<sup>-1</sup>; 9000 W kg<sup>-1</sup> @ 158 Wh kg<sup>-1</sup>; 71% capacitance retention after 5,000 cycles @ 5 A g<sup>-1</sup>.</b>                | <b>This Work</b> |

**Table S2:** Crystal Data and Structure Refinement Parameters.

| Structural Parameter                 | NCBMOF-11<br>(Single crystal)                                                     | NCBMOF-12<br>(Rietveld refinement)                                                  | NCBMOF-21<br>(Rietveld refinement)                                                  |
|--------------------------------------|-----------------------------------------------------------------------------------|-------------------------------------------------------------------------------------|-------------------------------------------------------------------------------------|
| Empirical formula                    | C <sub>7</sub> H <sub>9</sub> NO <sub>5</sub> Ni <sub>0.5</sub> Co <sub>0.5</sub> | C <sub>7</sub> H <sub>9</sub> NO <sub>5</sub> Ni <sub>0.33</sub> Co <sub>0.67</sub> | C <sub>7</sub> H <sub>9</sub> NO <sub>5</sub> Ni <sub>0.67</sub> Co <sub>0.33</sub> |
| Crystal system                       | Trigonal                                                                          | Trigonal                                                                            | Trigonal                                                                            |
| Crystal colour                       | Dark pinkish green                                                                | Dark pinkish green                                                                  | Light pinkish green                                                                 |
| Crystal shape                        | block                                                                             | block                                                                               | block                                                                               |
| Space group                          | <i>P</i> -3 (no.147)                                                              | <i>P</i> -3 (no.147)                                                                | <i>P</i> -3 (no.147)                                                                |
| <i>a</i> [Å]                         | 13.9082(5)                                                                        | 13.958(1)                                                                           | 13.898(2)                                                                           |
| <i>b</i> [Å]                         | 13.9082(5)                                                                        | 13.958(1)                                                                           | 13.898(2)                                                                           |
| <i>c</i> [Å]                         | 8.0810(3)                                                                         | 8.099(1)                                                                            | 8.031(1)                                                                            |
| $\alpha$ [°]                         | 90                                                                                | 90                                                                                  | 90                                                                                  |
| $\beta$ [°]                          | 90                                                                                | 90                                                                                  | 90                                                                                  |
| $\gamma$ [°]                         | 120                                                                               | 120                                                                                 | 120                                                                                 |
| <i>V</i> [Å <sup>3</sup> ]           | 1353.75(11)                                                                       | 1366.68(25)                                                                         | 1343.50(25)                                                                         |
| <i>T</i> [K]                         | 293(2)                                                                            | 298                                                                                 | 298                                                                                 |
| $\rho$ [calc., g cm <sup>-3</sup> ]  | 1.811                                                                             | 1.792                                                                               | 1.823                                                                               |
| $\mu$ [mm <sup>-1</sup> ]            | 1.896                                                                             | -----                                                                               | -----                                                                               |
| $\lambda$                            | 0.71073 [Mo K $\alpha$ /Å]                                                        | 1.5406 [Cu K $\alpha$ /Å]                                                           | 1.5406 [Cu K $\alpha$ /Å]                                                           |
| $\theta$ range [°]                   | 1.691-31.007                                                                      | 5-60                                                                                | 5-60                                                                                |
| R <sub>int</sub>                     | 0.0331                                                                            | -----                                                                               | -----                                                                               |
| R indexes [I>2 $\sigma$ (I)]         | R <sub>1</sub> = 0.0454<br>wR <sub>2</sub> = 0.1172                               | -----                                                                               | -----                                                                               |
| R indexes (all data)                 | R <sub>1</sub> = 0.0540;<br>wR <sub>2</sub> = 0.1229                              | -----                                                                               | -----                                                                               |
| R indexes (from Rietveld refinement) | -----                                                                             | WR <sub>P</sub> = 0.0760<br>R <sub>P</sub> = 0.0532                                 | WR <sub>P</sub> = 0.1081<br>R <sub>P</sub> = 0.0748                                 |
| $\chi^2$ (from Rietveld refinement)  | -----                                                                             | 1.57                                                                                | 2.38                                                                                |

<sup>a</sup>R<sub>1</sub> =  $\sum|F_o| - |F_c| / \sum|F_o|$ ; wR<sub>2</sub> =  $\{\sum[w(F_o^2 - F_c^2)] / \sum[w(F_o^2)]\}^{1/2}$ . w =  $1 / [\rho^2(F_o)^2 + (aP)^2 + bP]$ . P =  $[\max(F_o, O) + 2(F_c)^{-2}] / 3$  where a = 0.0783 and b = 0 for NCBMOF-11

**Table S3:** Bond length (M-O) data of NCBMOF-11.

| Atom1 | Atom2 | Length (Å) |
|-------|-------|------------|
| Co1   | O1    | 2.027(3)   |
| Co1   | O2    | 2.040(2)   |
| Co1   | O3    | 2.123(2)   |
| Co1   | O4    | 2.113(2)   |
| Co1   | O5    | 2.086(3)   |

**Table S4:** Bond angle (M-O-M) data of NCBMOF-11.

| Atom1 | Atom2 | Atom3 | Angle (°) |
|-------|-------|-------|-----------|
| O2    | Co1   | O4    | 90.01(8)  |
| O2    | Co1   | O3    | 90.42(8)  |
| O2    | Co1   | O1    | 86.69(9)  |
| O2    | Co1   | O4    | 177.25(8) |
| O2    | Co1   | O5    | 92.99(9)  |
| O4    | Co1   | O3    | 178.86(8) |
| O4    | Co1   | O1    | 96.04(9)  |
| O4    | Co1   | O4    | 88.83(8)  |
| O4    | Co1   | O5    | 94.78(9)  |
| O3    | Co1   | O1    | 85.05(9)  |
| O3    | Co1   | O4    | 90.79(9)  |
| O3    | Co1   | O5    | 84.14(9)  |
| O1    | Co1   | O4    | 90.95(9)  |
| O1    | Co1   | O5    | 169.2(1)  |
| O4    | Co1   | O5    | 89.59(9)  |

**Table S5:** Crystal lattice parameters and CCDC numbers for the reported MOFs with BTC linker.

| Compound                                                                                                                   | Crystal Lattice Parameters                                                                                                                        | CCDC No. | References                                                                 |
|----------------------------------------------------------------------------------------------------------------------------|---------------------------------------------------------------------------------------------------------------------------------------------------|----------|----------------------------------------------------------------------------|
| Catena-[tetrakis( $\mu$ -benzene-1,3,5-tricarboxylato)-bis( $\mu$ -6amino-7H-purin-7-yl)-triqua-hexa-zinc unknown solvate] | Space Group: <i>P</i> -1 (2),<br>a (Å) 14.208<br>b (Å) 17.229<br>c (Å) 26.158<br>$\alpha$ (°) 88.764<br>$\beta$ (°) 74.470<br>$\gamma$ (°) 70.377 | 1057226  | <i>Angewandte Chemie, International Edition</i> , 2015, <b>54</b> , 10454. |
| tetrakis( $\mu$ -benzene-1,3,5-tricarboxylato)-hexatricontacarbonyl-dodeca-osmium dichloromethane n-hexane solvate         | Space Group: <i>P</i> -1 (2),<br>a (Å) 16.096<br>b (Å) 17.128<br>c (Å) 26.844<br>$\alpha$ (°) 88.620<br>$\beta$ (°) 88.628<br>$\gamma$ (°) 63.616 | 1949184  | <i>Inorganic Chemistry Communications</i> , 2020, <b>121</b> , 108212.     |

|                                                                                                                                                    |                                                                                                                                                                 |         |                                                          |
|----------------------------------------------------------------------------------------------------------------------------------------------------|-----------------------------------------------------------------------------------------------------------------------------------------------------------------|---------|----------------------------------------------------------|
| catena-(bis( $\mu_6$ -Benzene-1,3,5-tricarboxylato)-tetrakis(N,N-dimethylformamide)-tri-magnesium(ii))                                             | Space<br>Group: P<br>2 <sub>1</sub> /c (14),<br>a (Å) 17.490<br>b (Å) 11.940<br>c (Å) 18.460<br>$\alpha$ (°) 90.00<br>$\beta$ (°) 116.870<br>$\gamma$ (°) 90.00 | 887454  | <i>Inorganica Chimica Acta</i> , 2013, <b>394</b> , 452. |
| catena-(bis( $\mu_3$ -Benzene-1,3,5-tricarboxylato)-( $\mu_3$ -benzene-1,3,5-tricarboxylic acid)-hexakis(N,N-dimethylformamide)-tri-magnesium(ii)) | Space<br>Group: P<br>6 <sub>3</sub> /m (176),<br>a (Å) 16.596<br>b (Å) 16.596<br>c (Å) 14.351<br>$\alpha$ (°) 90<br>$\beta$ (°) 90<br>$\gamma$ (°) 120.00       | 887452  | <i>Inorganica Chimica Acta</i> , 2013, <b>394</b> , 452. |
| catena-(tris(trimethylammonium)tris( $\mu_3$ -benzene-1,3,5-tricarboxylato)-hexakis(N,N-dimethylformamide)-tri-magnesium(ii))                      | Space<br>Group: P<br>6 <sub>3</sub> /m (176),<br>a (Å) 16.596<br>b (Å) 16.596<br>c (Å) 14.351<br>$\alpha$ (°) 90.00<br>$\beta$ (°) 90.00<br>$\gamma$ (°) 120.00 | 887453  | <i>Inorganica Chimica Acta</i> , 2013, <b>394</b> , 452. |
| Ni-BTC(solvent:An1)                                                                                                                                | Space<br>Group: P -<br>3 (147),<br>a (Å) 11.003<br>b (Å) 11.003<br>c (Å) 7.045<br>$\alpha$ (°) 90.00<br>$\beta$ (°) 90.00<br>$\gamma$ (°) 120.00                | 1941312 | <i>Quimica Nova</i> , 2016, <b>39</b> , 669.             |
| Ni-BTC(solvent:DMF)                                                                                                                                | Space<br>Group: P<br>2 <sub>1</sub> /c (14),<br>a (Å) 12.772<br>b (Å) 21.245<br>c (Å) 24.620<br>$\alpha$ (°) 90.00<br>$\beta$ (°) 111.021<br>$\gamma$ (°) 90.00 | 1941313 | <i>Quimica Nova</i> , 2016, <b>39</b> , 669.             |
| Ni-BTC(solvent:EtOH)                                                                                                                               | Space<br>Group: P<br>2 <sub>1</sub> /c (14),<br>a (Å) 8.340<br>b (Å) 31.240<br>c (Å) 24.620<br>$\alpha$ (°) 90.00<br>$\beta$ (°) 117.833<br>$\gamma$ (°) 90.00  | 1941314 | <i>Quimica Nova</i> , 2016, <b>39</b> , 669.             |

|                                                                                                                                                                                                             |                                                                                                                                             |         |                                                                                |
|-------------------------------------------------------------------------------------------------------------------------------------------------------------------------------------------------------------|---------------------------------------------------------------------------------------------------------------------------------------------|---------|--------------------------------------------------------------------------------|
| Ni-BTC(solvent:<br>NaOH/NH <sub>4</sub> OH)                                                                                                                                                                 | Space<br>Group: C 2/c<br>(15),<br>a (Å)<br>24.628<br>b (Å) 6.552<br>c (Å) 13.291<br>α (°) 90.00<br>β (°)<br>116.011<br>γ (°) 90.00          | 1941315 | <i>Quimica Nova</i> , 2016, <b>39</b> , 669.                                   |
| Ni-BTC(solvent:Pyr)                                                                                                                                                                                         | Space<br>Group: P<br>2 <sub>1</sub> /c (14),<br>a (Å) 12.772<br>b (Å) 21.245<br>c (Å) 24.620<br>α (°) 90.00<br>β (°) 111.021<br>γ (°) 90.00 | 1941316 | <i>Quimica Nova</i> , 2016, <b>39</b> , 669.                                   |
| Ni-BTC(solvent:TMA)                                                                                                                                                                                         | Space<br>Group: P -<br>1 (2),<br>a (Å) 8.804<br>b (Å) 8.842<br>c (Å) 15.885<br>α (°) 77.424<br>β (°) 88.961<br>γ (°) 61.332                 | 1941317 | <i>Quimica Nova</i> , 2016, <b>39</b> , 669.                                   |
| C <sub>72</sub> H <sub>12</sub> O <sub>60</sub> Os <sub>12</sub>                                                                                                                                            | Space<br>Group: P -<br>1 (2),<br>a (Å) 16.096<br>b (Å) 17.128<br>c (Å) 26.844<br>α (°) 88.620<br>β (°) 88.628<br>γ (°) 63.616               | 2185269 | <i>Inorganic Chemistry<br/>Communications</i> , 2020, <b>121</b> , 108212.     |
| (C <sub>9</sub> H <sub>3</sub> O <sub>24</sub> Tb) <sub>n</sub> ,2H <sub>2</sub> O                                                                                                                          | Space<br>Group: P<br>4 <sub>3</sub> 2 2 (95),<br>a (Å) 10.279<br>b (Å) 10.279<br>c (Å) 14.538<br>α (°) 90.00<br>β (°) 90.00<br>γ (°) 90.00  | 2227727 | <i>Journal of the American Chemical<br/>Society</i> , 2005, <b>127</b> , 1504. |
| 4(C <sub>18</sub> H <sub>12</sub> Cu <sub>3</sub> O <sub>15</sub> ) <sub>n</sub> ,<br>GeO <sub>44</sub> W <sub>12</sub> <sup>2-</sup> , C <sub>4</sub> H <sub>24</sub> N <sup>+</sup> ,12(H <sub>2</sub> O) | Space<br>Group: F<br>m -3 m<br>(225),<br>a (Å) 26.318<br>b (Å) 26.318<br>c (Å) 26.318                                                       | 2227728 | <i>Journal of the American Chemical<br/>Society</i> , 2009, <b>131</b> , 1883. |

|                                                                                                                           |                                                                                                                                        |         |                                                           |
|---------------------------------------------------------------------------------------------------------------------------|----------------------------------------------------------------------------------------------------------------------------------------|---------|-----------------------------------------------------------|
|                                                                                                                           | $\alpha$ (°) 90.00<br>$\beta$ (°) 90.00<br>$\gamma$ (°) 90.00                                                                          |         |                                                           |
| Catena-[( $\mu_6$ -Benzene-1,3,5-tricarboxylato)-tris( $\mu_2$ -formato-O,O')-tris(dimethylformamide-O)-tri-nickel(ii)]   | Space<br>Group: P -3<br>a (Å) 13.823<br>b (Å) 13.823<br>c (Å) 7.9625<br>$\alpha$ (°) 90.00<br>$\beta$ (°) 90.00<br>$\gamma$ (°) 120.00 | 802890  | <i>Inorganic Chemistry</i> , 2011, <b>50</b> , 5085-5097. |
| [Co <sub>3</sub> Ni <sub>3</sub> (BTC <sup>3-</sup> ) <sub>2</sub> (HCOO <sup>-</sup> ) <sub>6</sub> (DMF) <sub>6</sub> ] | Space<br>Group: P -3<br>a (Å) 13.908<br>b (Å) 13.908<br>c (Å) 8.0810<br>$\alpha$ (°) 90.00<br>$\beta$ (°) 90.00<br>$\gamma$ (°) 120.00 | 2517104 | This Work                                                 |

**Table S6:** ICP-OES results of NCBMOF-11, NCBMOF-12, and NCBMOF-21.

| Sample name | Ni content (ppm) | Co content (ppm) | Ni:Co molar ratio |
|-------------|------------------|------------------|-------------------|
| NCBMOF-11   | 7.524796289      | 7.245974552      | 1:1.04            |
| NCBMOF-12   | 5.094065209      | 9.444368253      | 1:1.85            |
| NCBMOF-21   | 8.874164224      | 4.385581907      | 2:0.98            |

**Table S7:** Rietveld refinement parameters of NCBMOF@PBA-21 and AIVO.

| NCBMOF@PBA-21              | AIVO                      |
|----------------------------|---------------------------|
| Space group: <i>P 21/c</i> | Space group: <i>P -1</i>  |
| $a = 7.20(1)$ Å            | $a = 10.836(2)$ Å         |
| $b = 7.23(1)$ Å            | $b = 9.514(3)$ Å          |
| $c = 12.78(2)$ Å           | $c = 14.104(3)$ Å         |
| $\alpha = 90.00(0)^\circ$  | $\alpha = 92.31(2)^\circ$ |
| $\beta = 122.76(13)^\circ$ | $\beta = 91.14(2)^\circ$  |
| $\gamma = 90.00(0)^\circ$  | $\gamma = 86.22(3)^\circ$ |
| WR <sub>P</sub> = 7.41%    | WR <sub>P</sub> = 4.30%   |

|                                   |                                   |
|-----------------------------------|-----------------------------------|
| $R_p = 5.79\%$<br>$\chi^2 = 0.81$ | $R_p = 3.26\%$<br>$\chi^2 = 0.86$ |
|-----------------------------------|-----------------------------------|

**Table S8:**  $R_s$  and  $R_{CT}$  data of NCBMOF-12 and NCBMOF@PBA-12 positive electrodes at before and after cycling test.

|                       | NCBMOF-12 |       | NCBMOF@PBA-12 |       |
|-----------------------|-----------|-------|---------------|-------|
|                       | Before    | After | Before        | After |
| $R_s$ [ $\Omega$ ]    | 6         | 6     | 6             | 6     |
| $R_{CT}$ [ $\Omega$ ] | 10        | 60    | 2             | 2.5   |

**Table S9:**  $R_s$  and  $R_{CT}$  data of AIVO and AIVO@C negative electrodes at before and after cycling test.

|                       | AIVO   |       | AIVO@C |       |
|-----------------------|--------|-------|--------|-------|
|                       | Before | After | Before | After |
| $R_s$ [ $\Omega$ ]    | 6      | 6     | 6      | 6     |
| $R_{CT}$ [ $\Omega$ ] | 13     | 72    | 8      | 9.5   |

**Table S10:**  $R_s$  and  $R_{CT}$  data of NCBMOF@PBA-12//AIVO@C full cells at before and after cycling test.

|                       | Cycling within 0-1.2 V |       | Cycling within 0-1.5 V |       | Cycling within 0-1.8 V |       |
|-----------------------|------------------------|-------|------------------------|-------|------------------------|-------|
|                       | Before                 | After | Before                 | After | Before                 | After |
| $R_s$ [ $\Omega$ ]    | 0.96                   | 0.96  | 0.97                   | 0.97  | 1.17                   | 1.17  |
| $R_{CT}$ [ $\Omega$ ] | 1.74                   | 2.15  | 1.73                   | 2.12  | 2.04                   | 4.06  |

## Supporting Figures

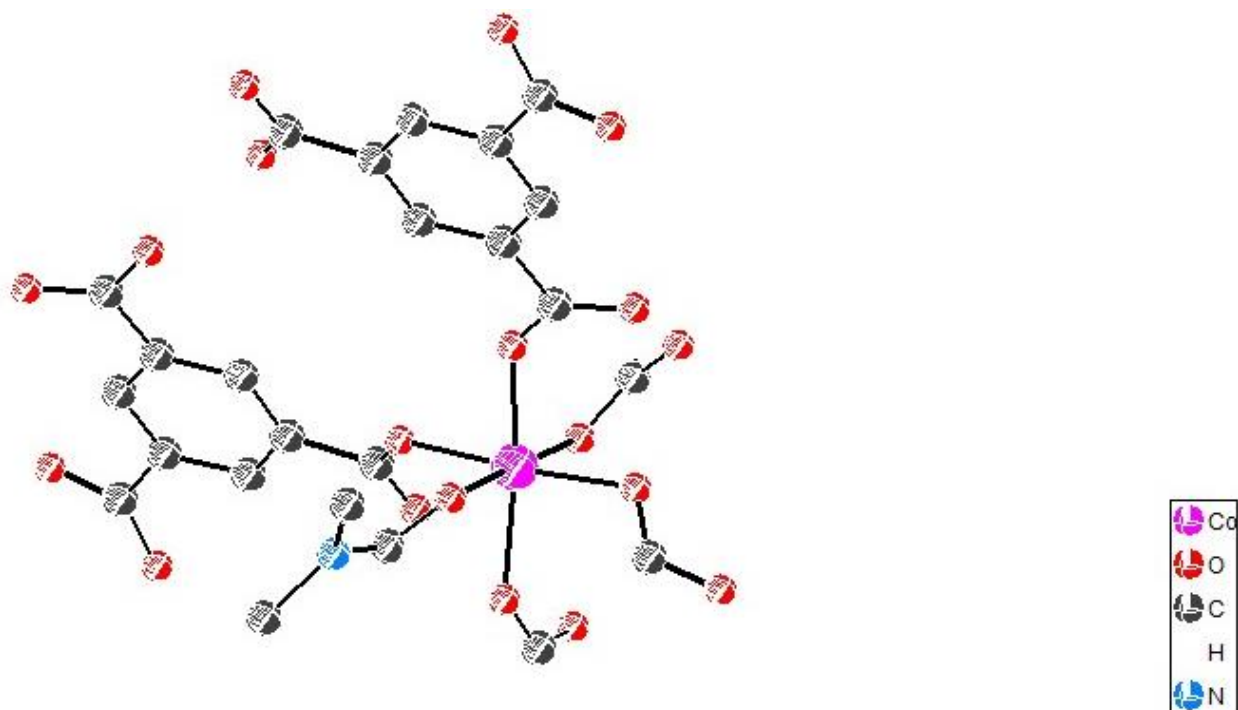

**Figure S1.** Asymmetric unit of NCBMOF-11.

(a)

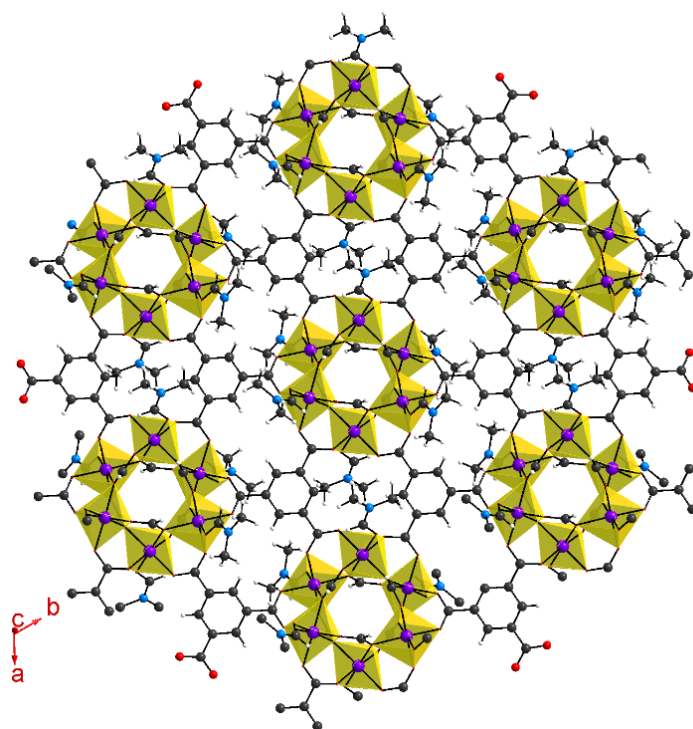

(b)

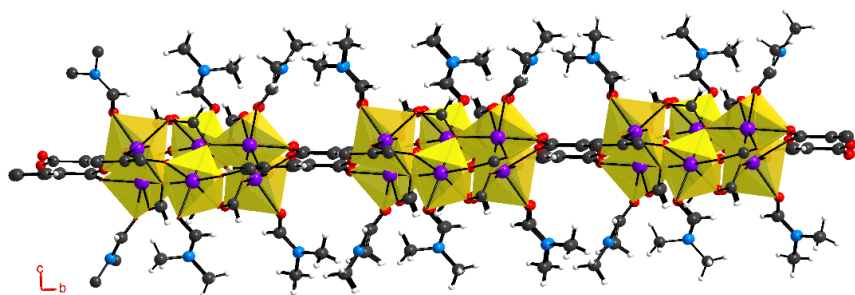

**Figure S2:** (a) 2D layer and (b) view of 2D layers along the crystallographic *a*-axis of NCBMOF-11.

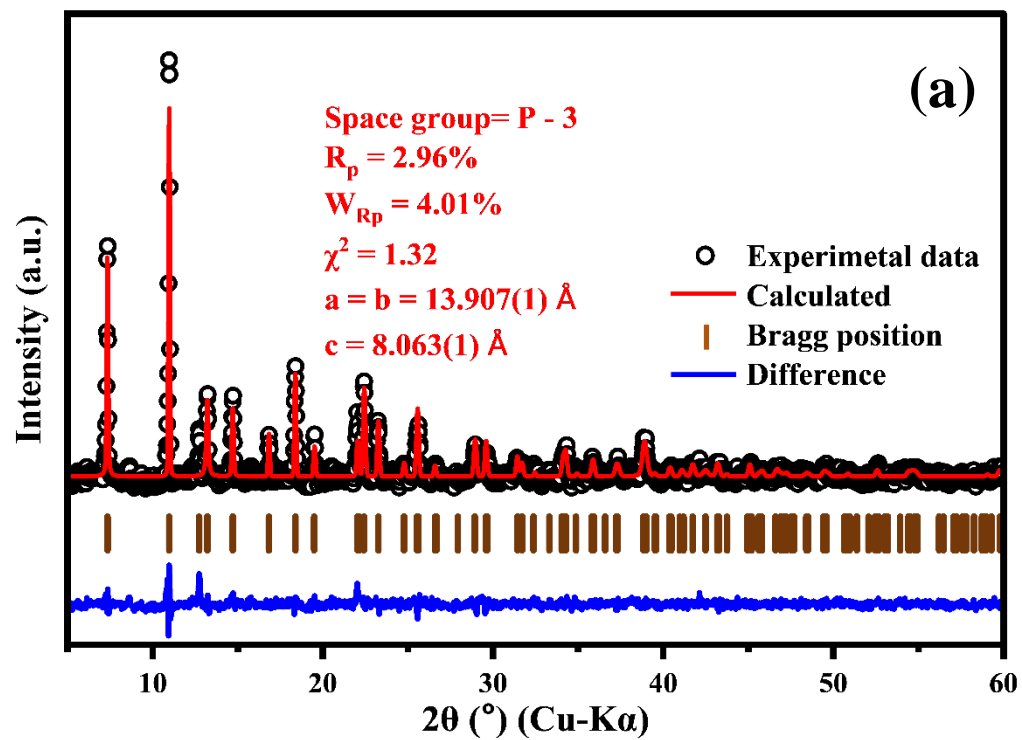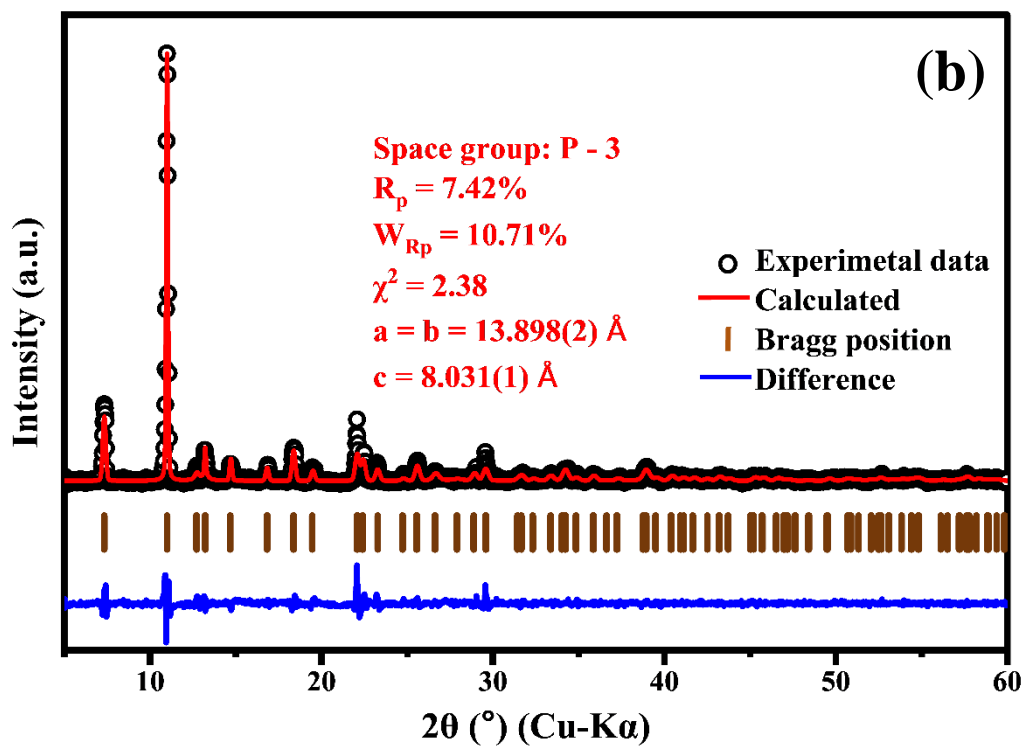

Figure S3: PXRD refinement plot of (a) NCBMOF-11 and (b) NCBMOF-21.

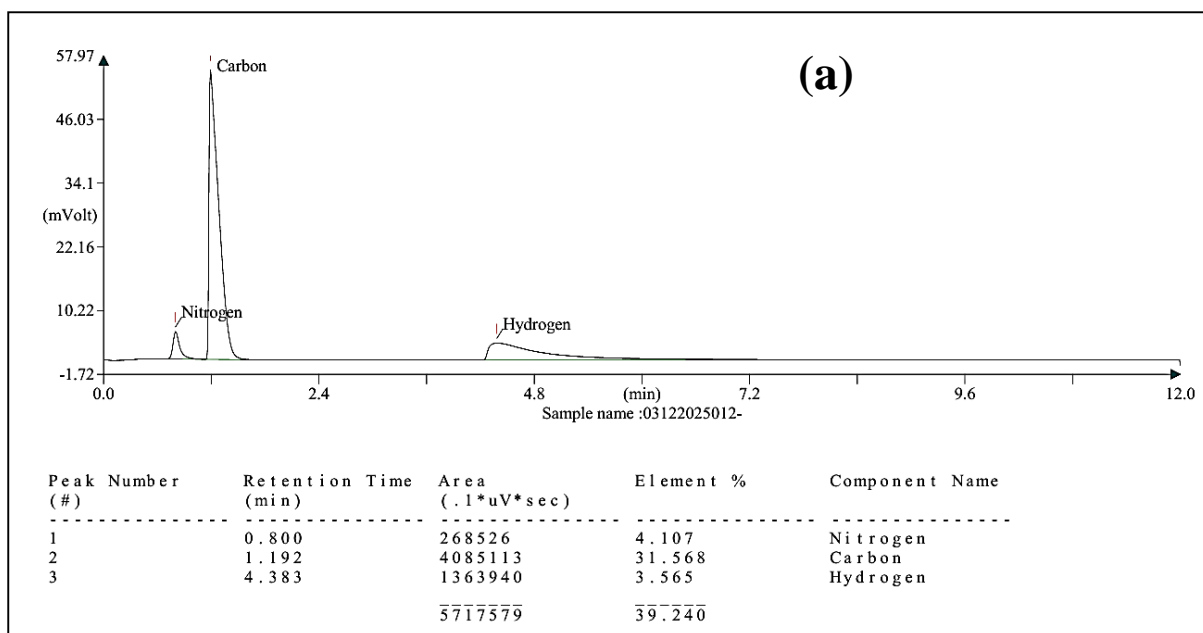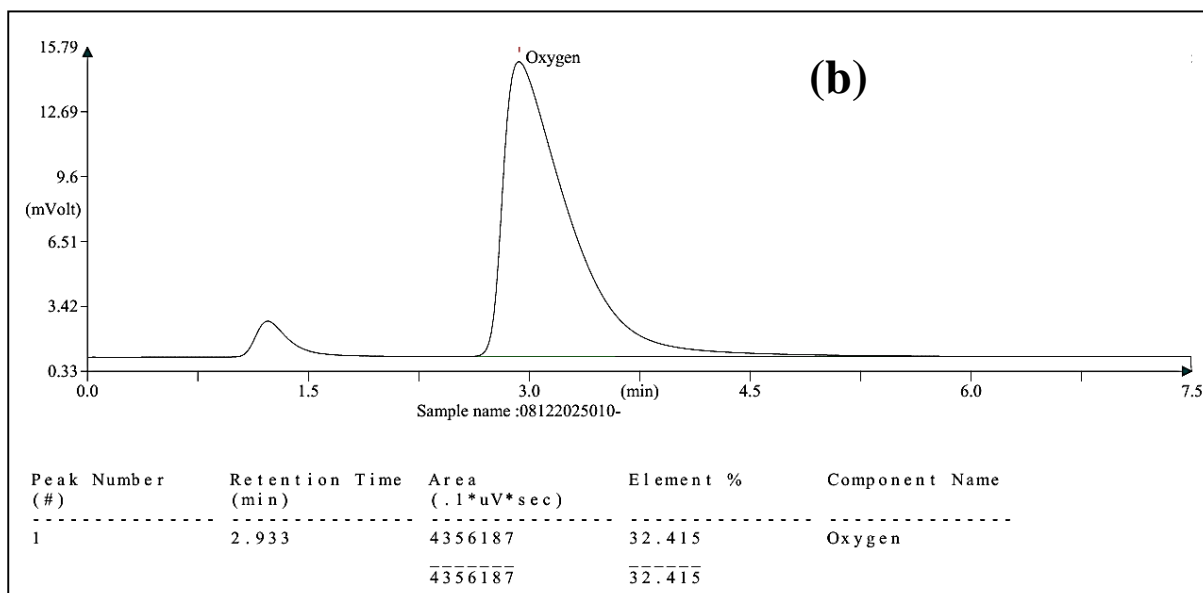

**Figure S4:** (a) CHNS and (b) oxygen analysis data of NCBMOF-11.

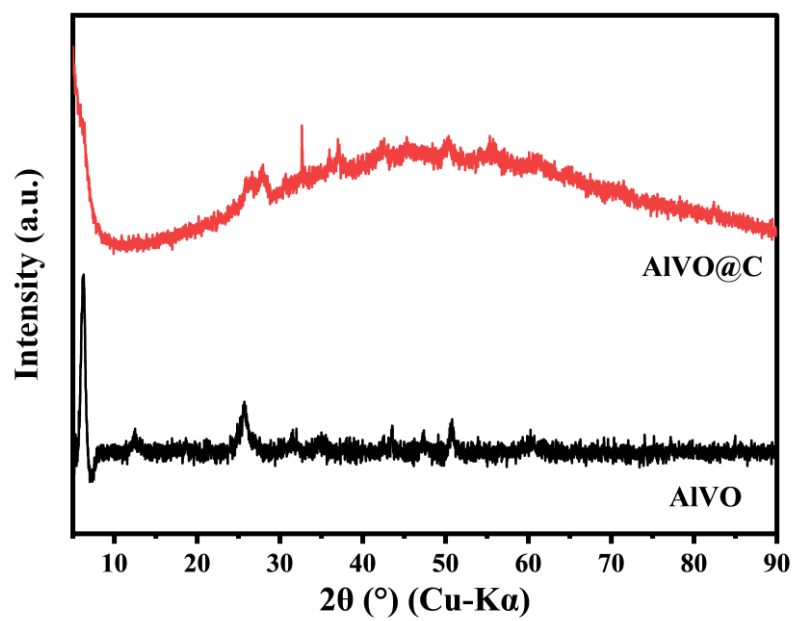

**Figure S5:** PXRD plots of AIVO and AIVO@C.

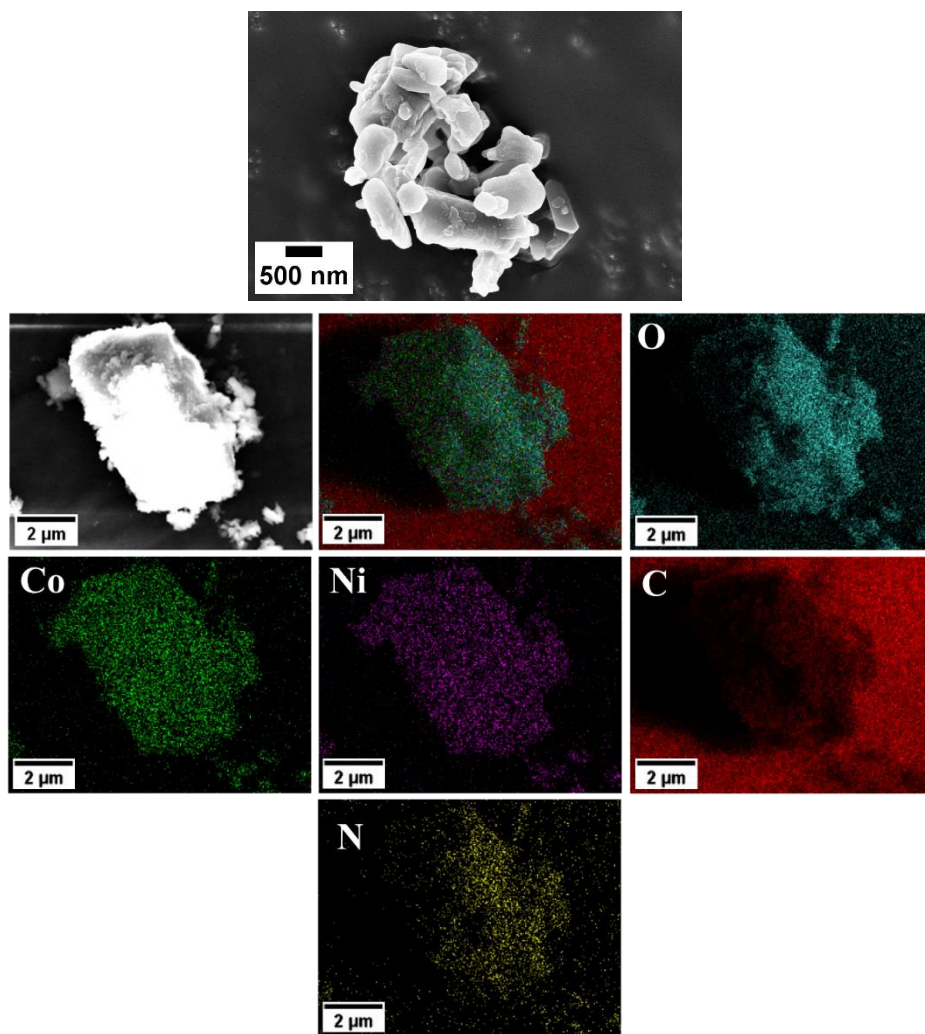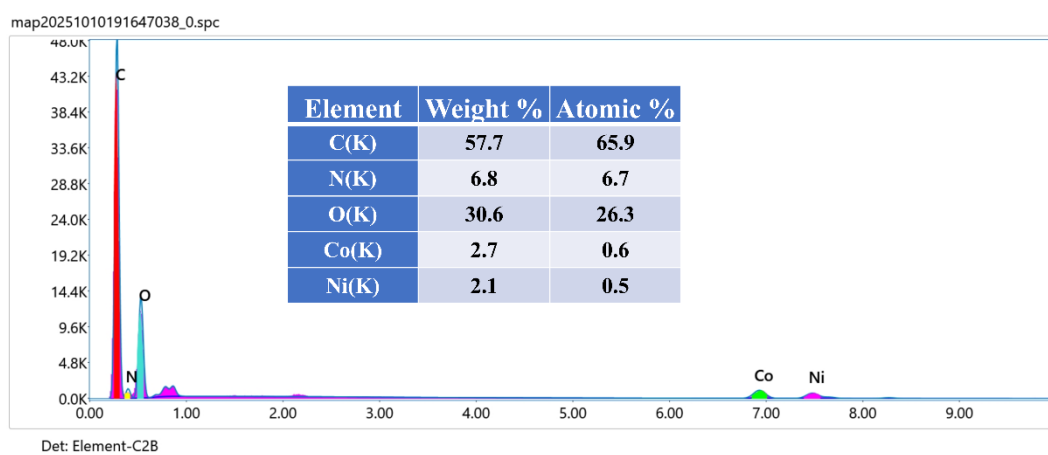

**Figure S6:** FESEM-EDX data of NCBMOF-11.

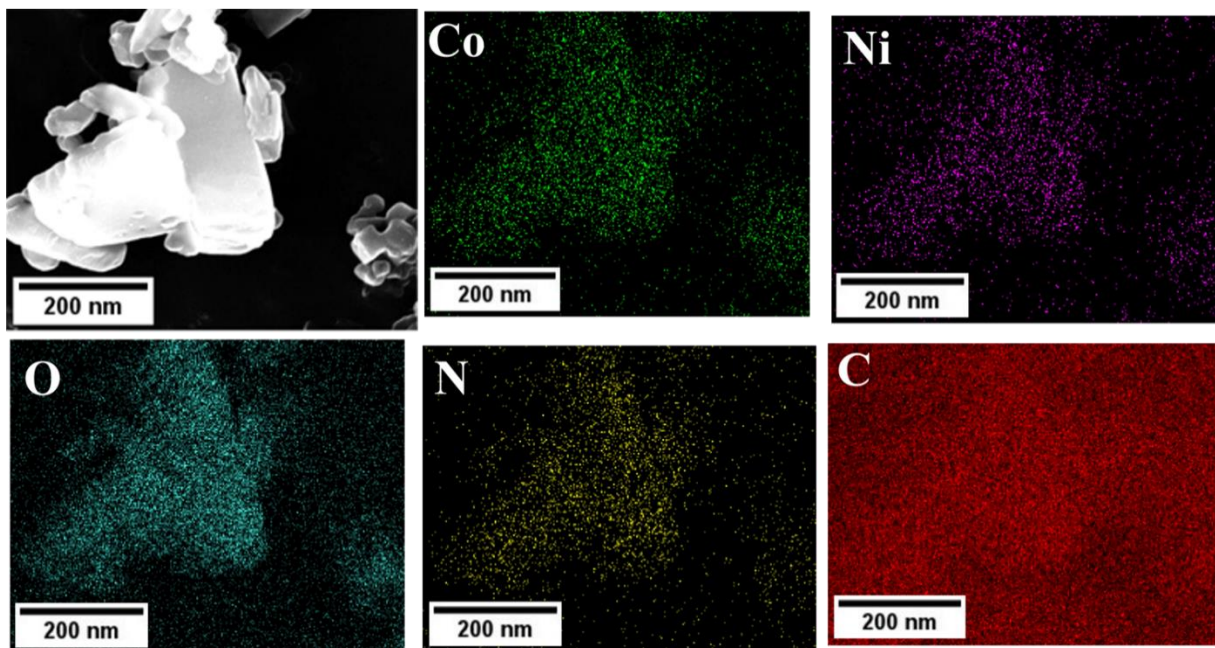

map20251010172347669\_0.spc

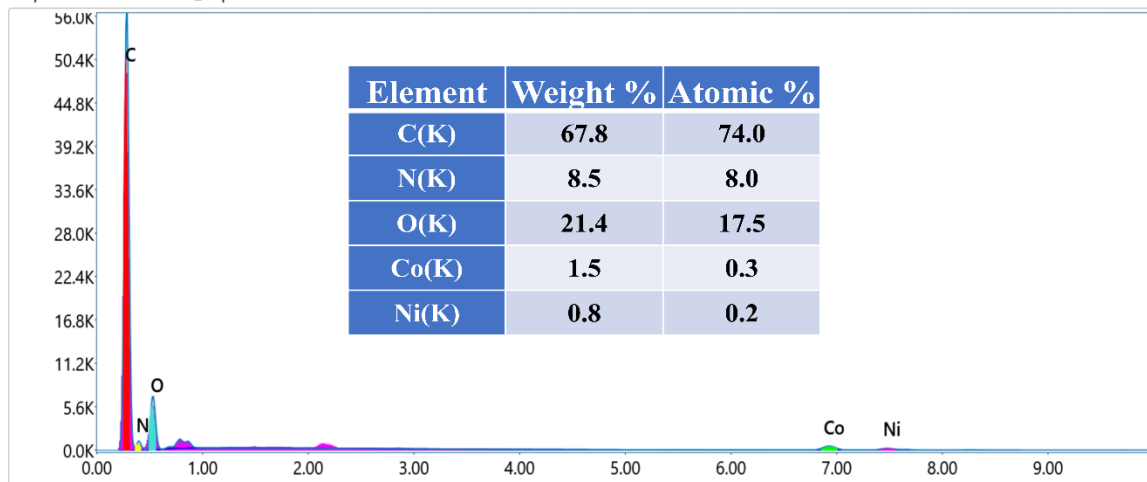

Det: Element-C2B

**Figure S7:** FESEM-EDX data of NCBMOF-12.-

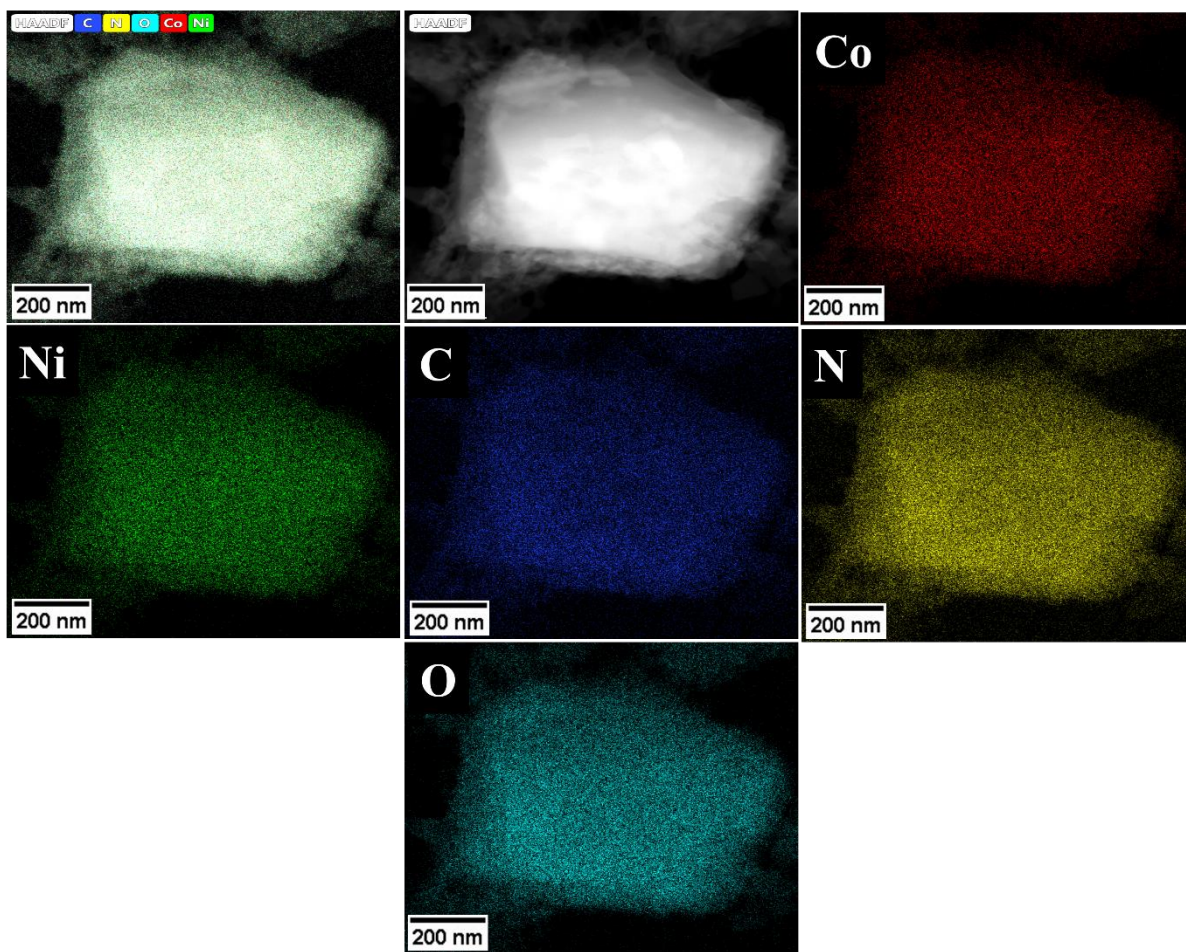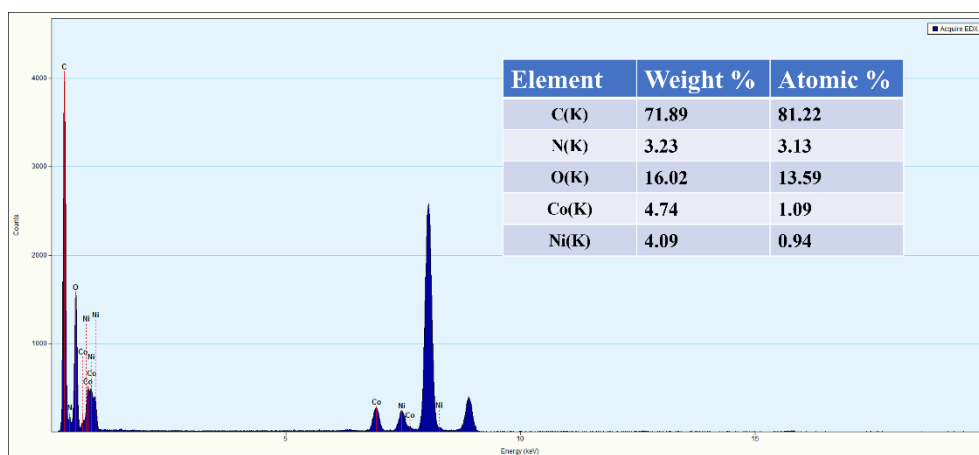

**Figure S8:** HAADF-STEM EDX data of NCBMOF-12.

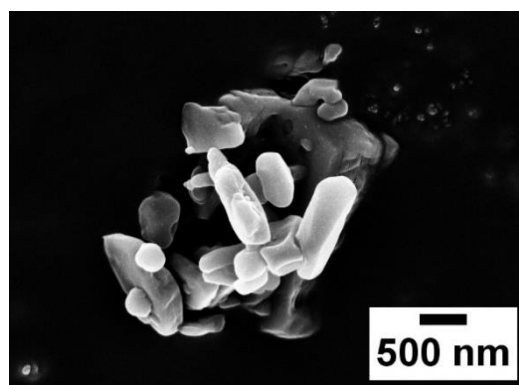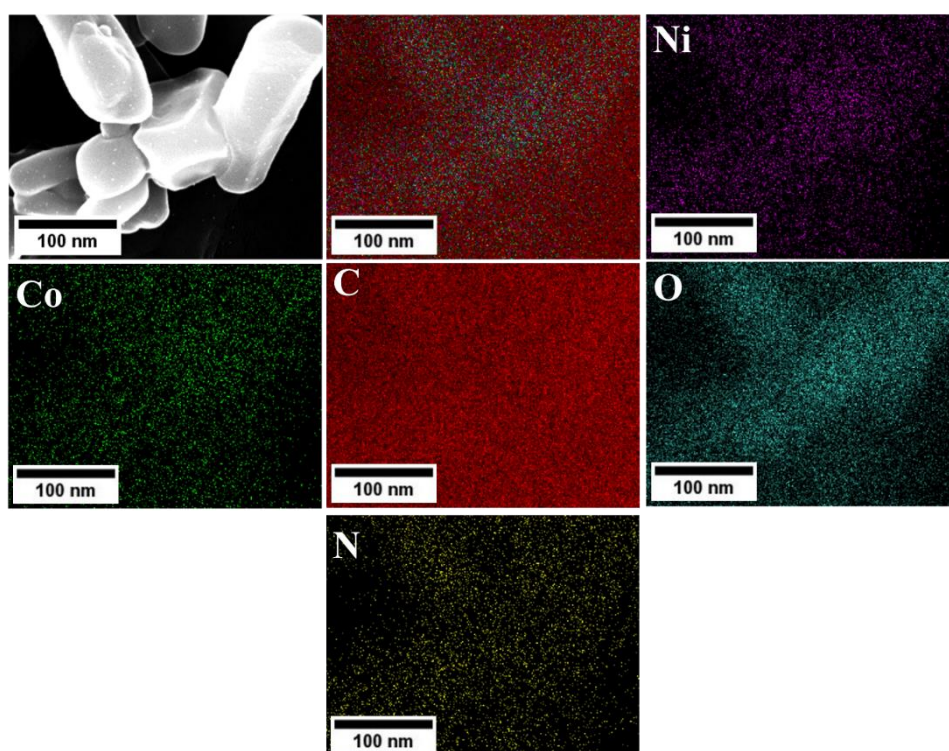

map20251010165922022\_0.spc

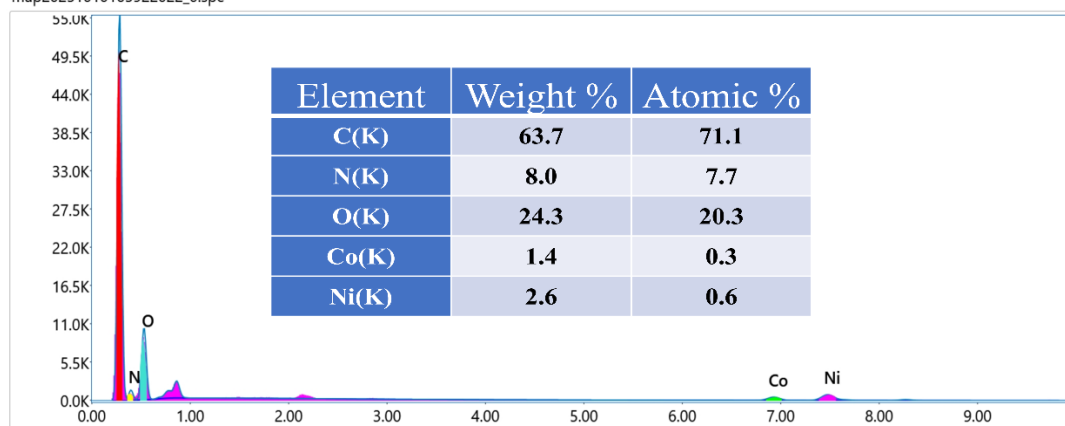

Det: Element-C2B

**Figure S9:** FESEM-EDX data of NCBMOF-21.

map20251010185942667\_0.spc

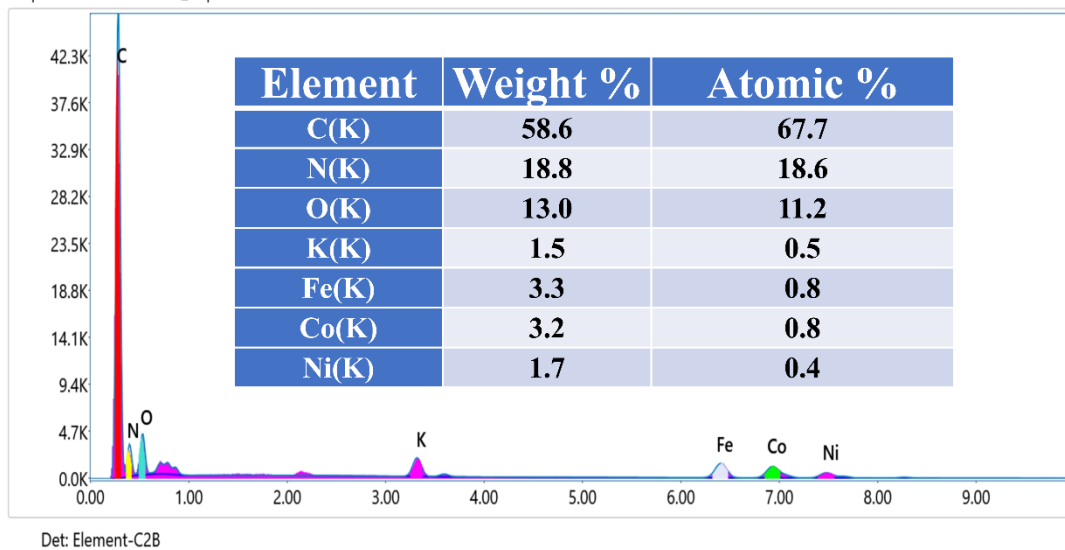

**Figure S10:** FESEM-EDX data of NCBMOF@PBA-12.

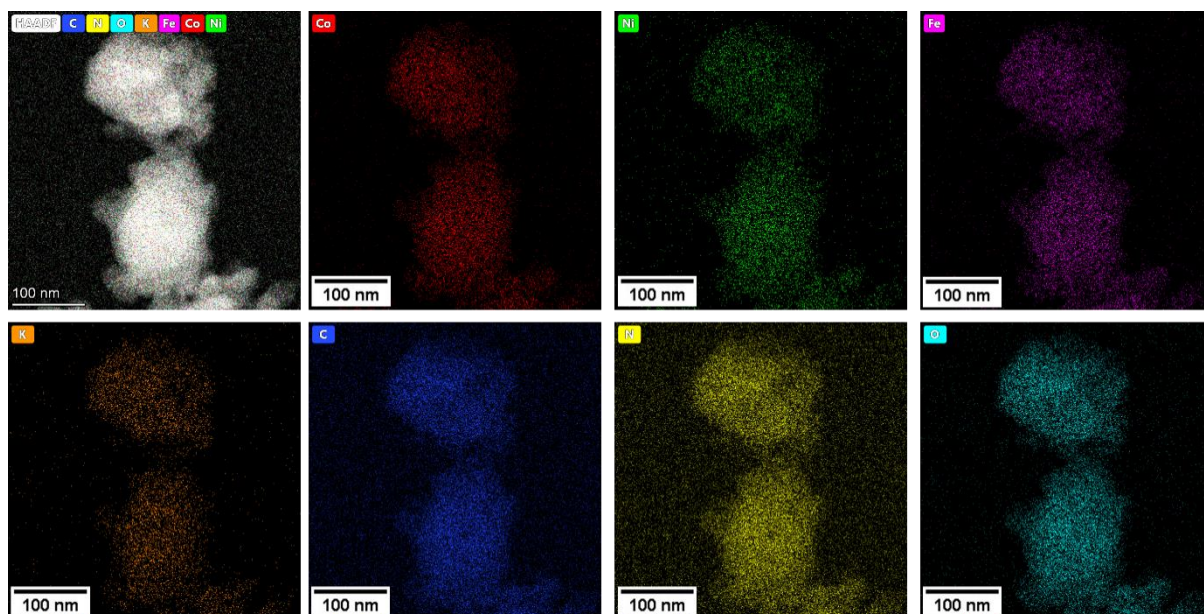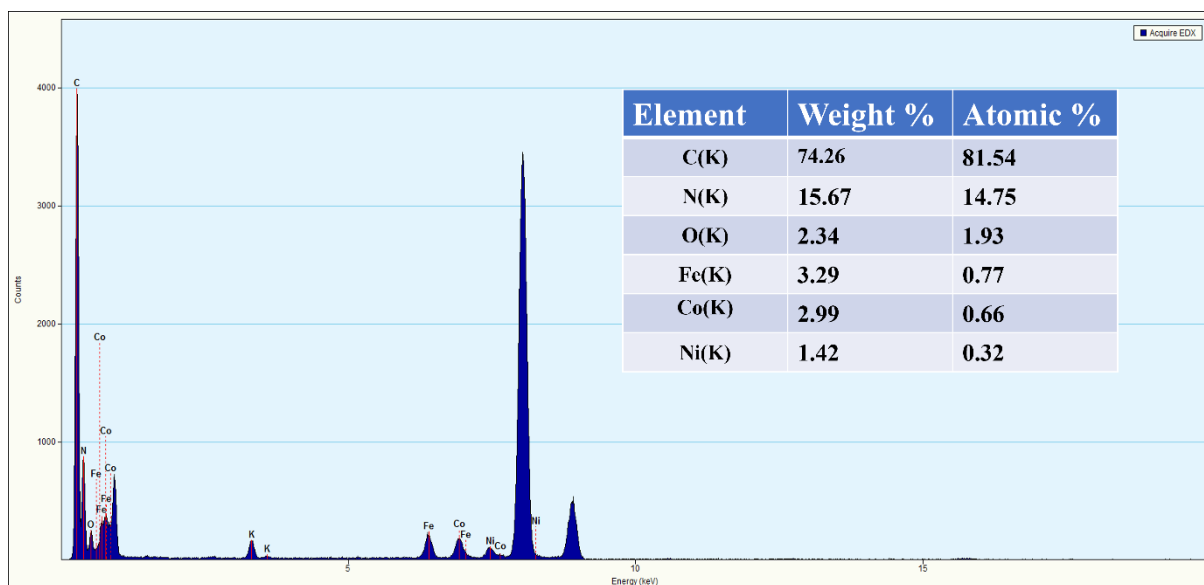

**Figure S11:** HAADF-STEM EDX data of NCBMOF@PBA-12.

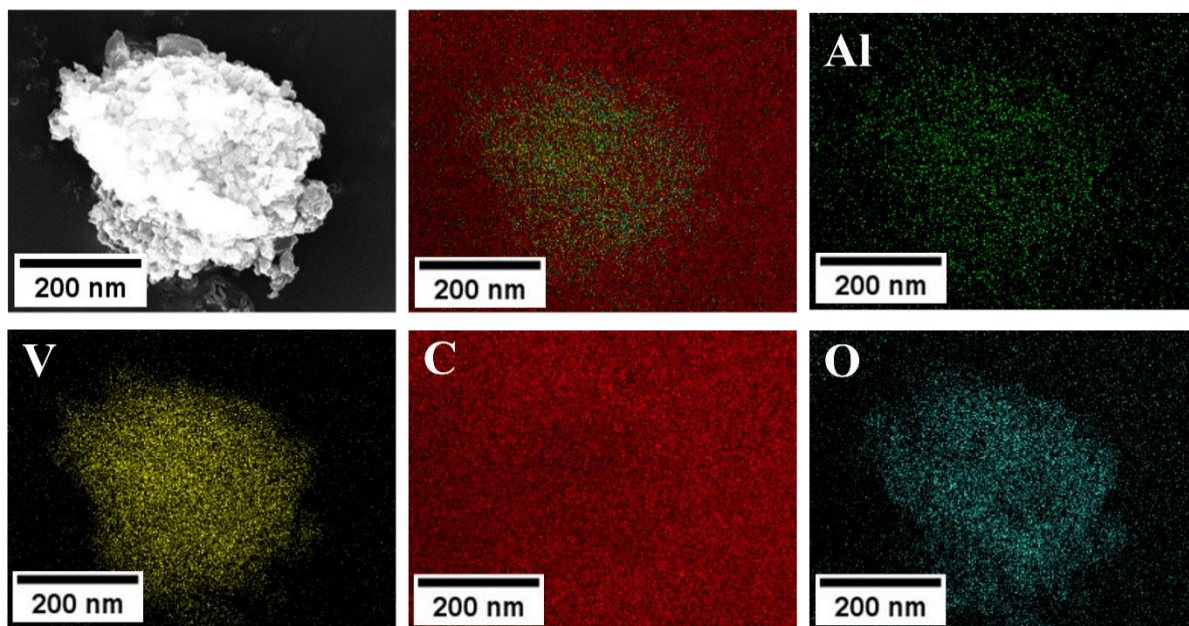

map20251010184754728\_0.spc

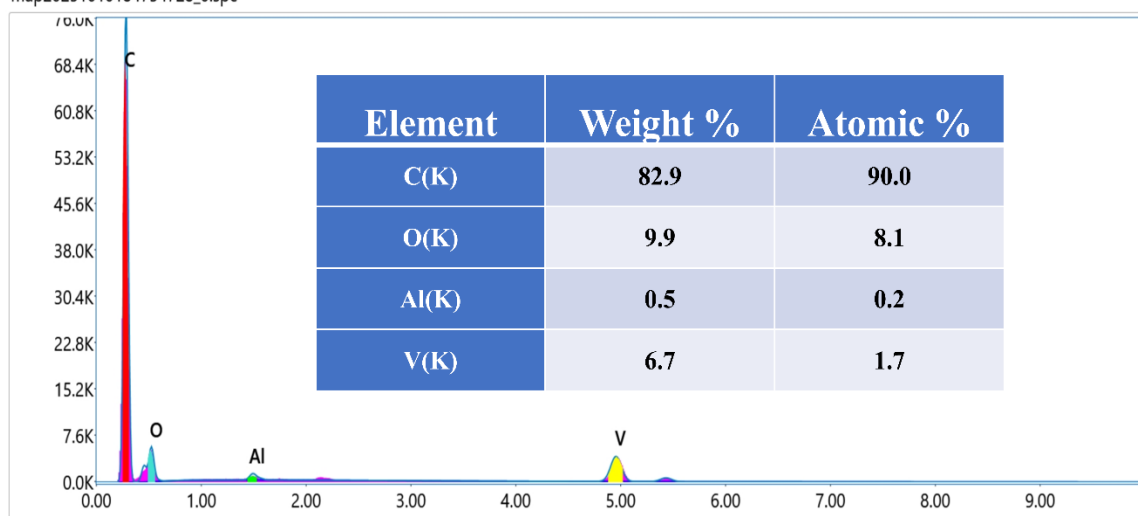

Det: Element-C2B

**Figure S12:** FESEM-EDX data of AlVO.

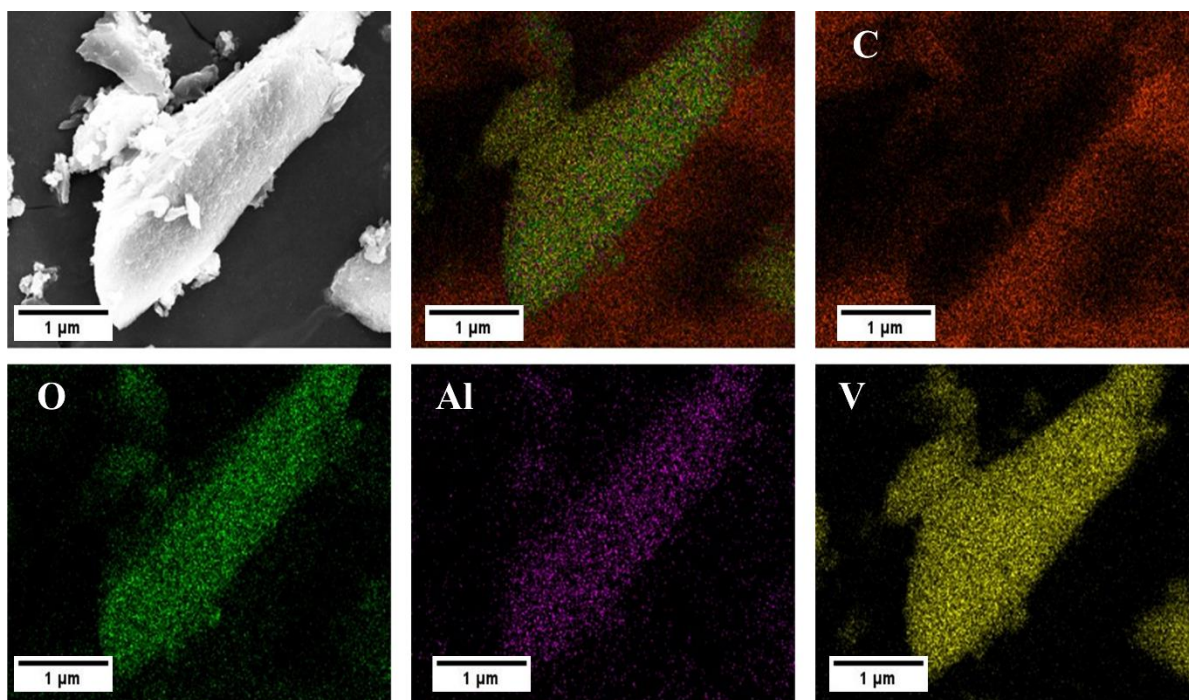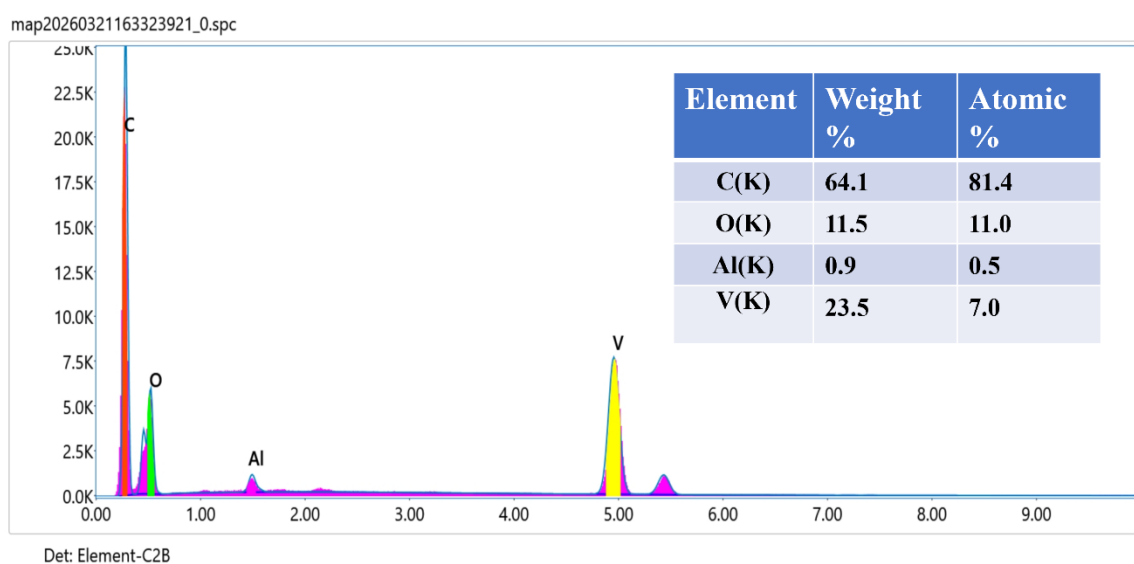

**Figure S13:** FESEM-EDX data of AlVO@C.

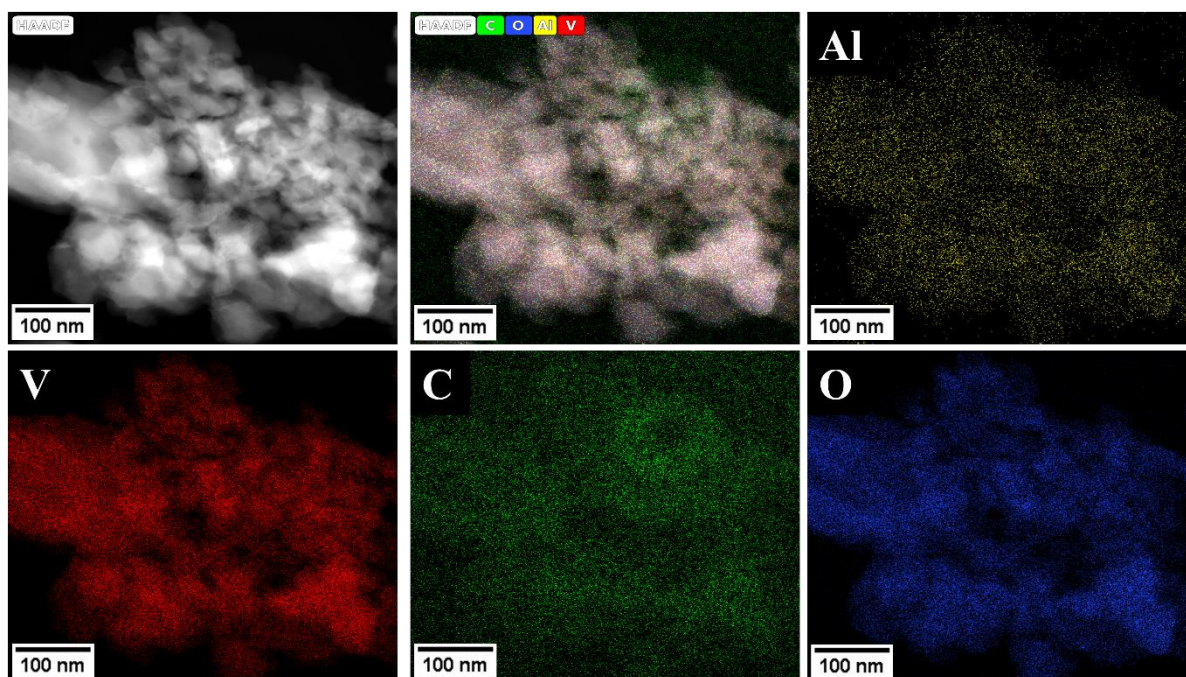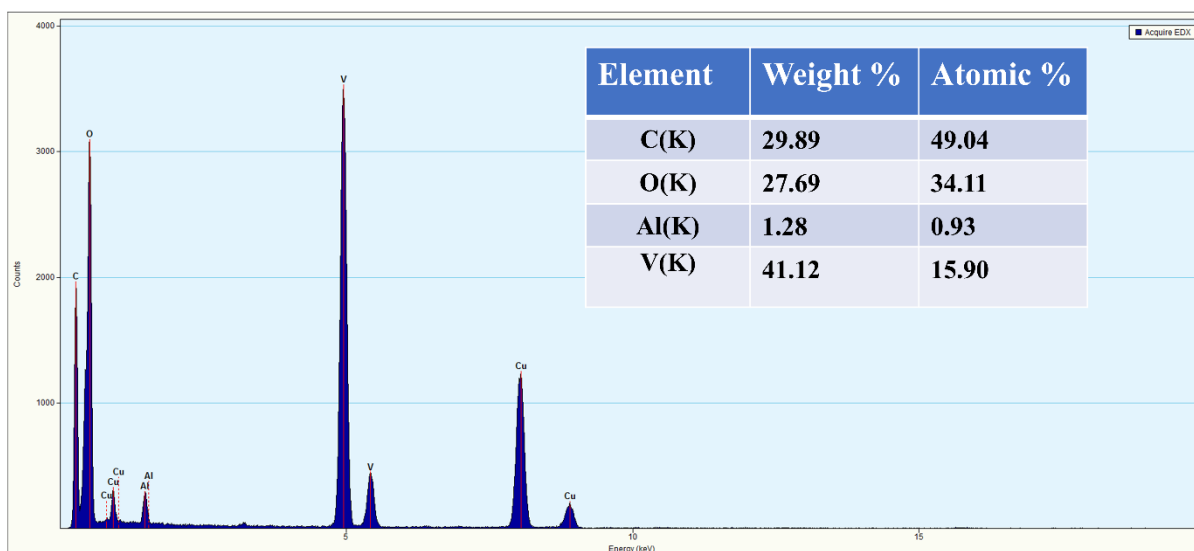

**Figure S14:** HAADF-STEM EDX data of AlVO.

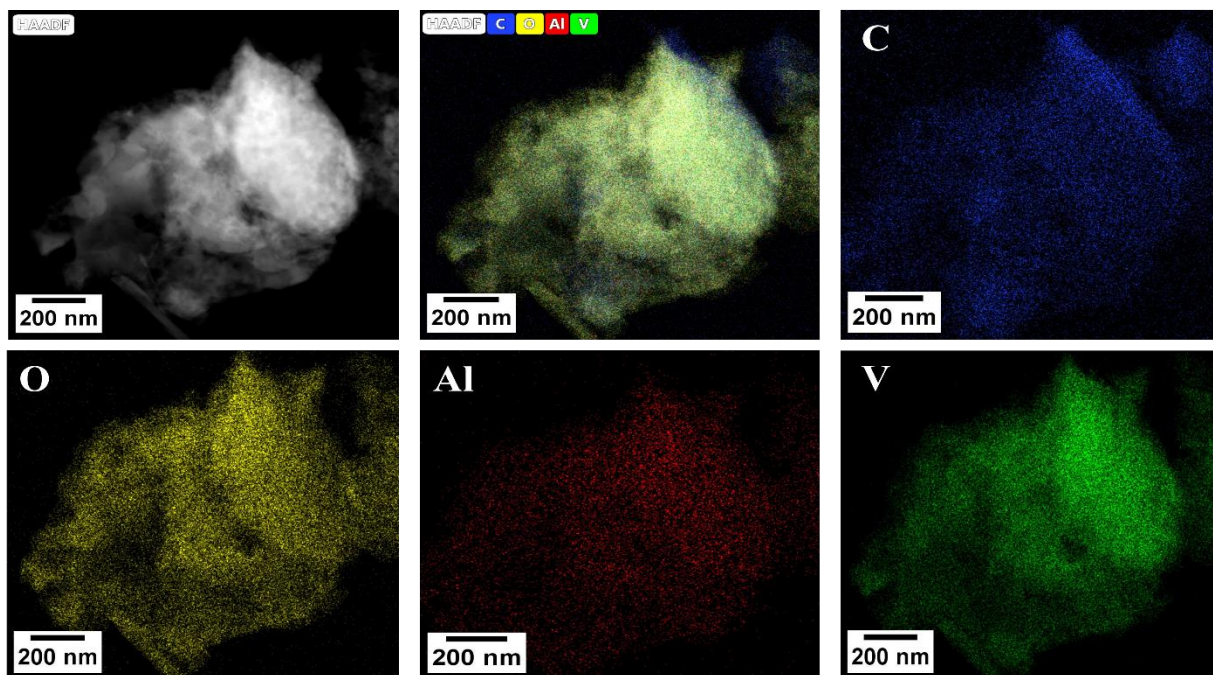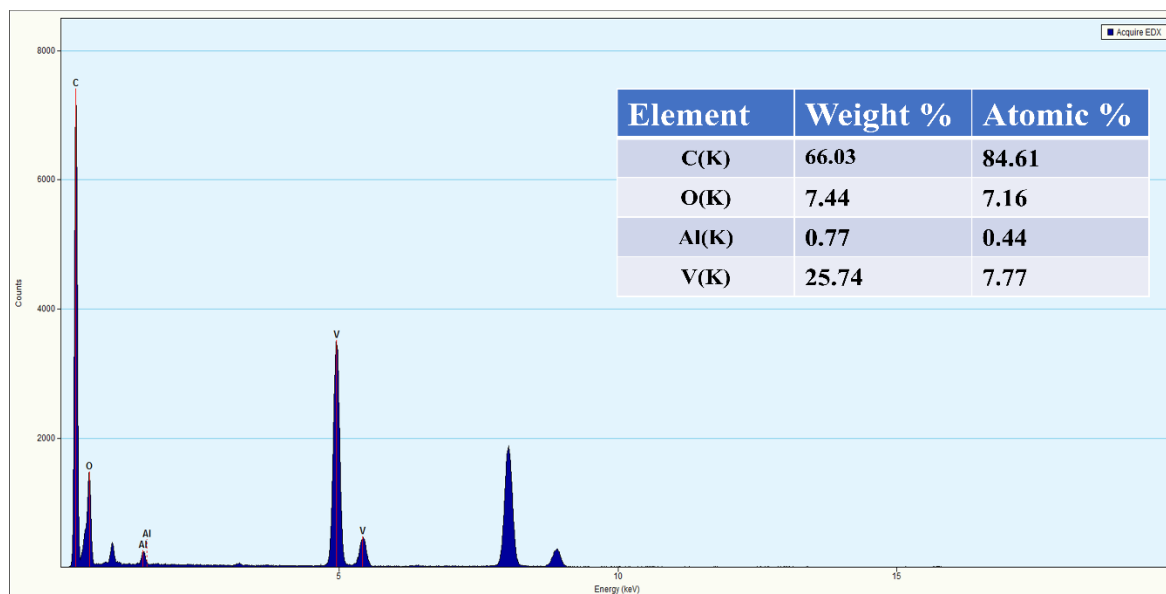

**Figure S15:** HAADF-STEM EDX data of AlVO@C.

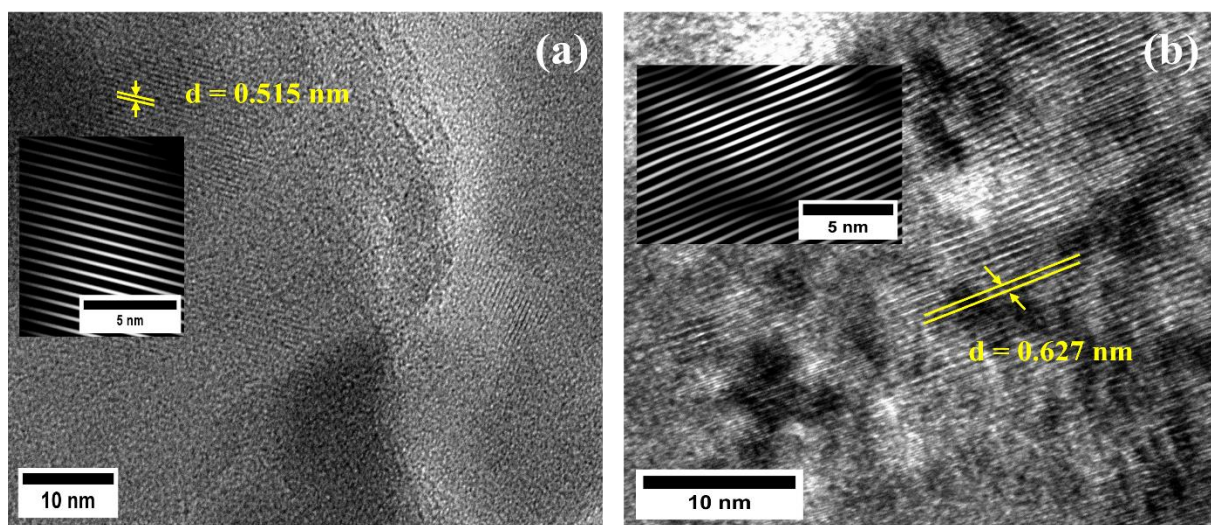

**Figure S16:** HRTEM images showing lattice fringes: (a) NCBMOF@PBA-12 and (b) AIVO@C.

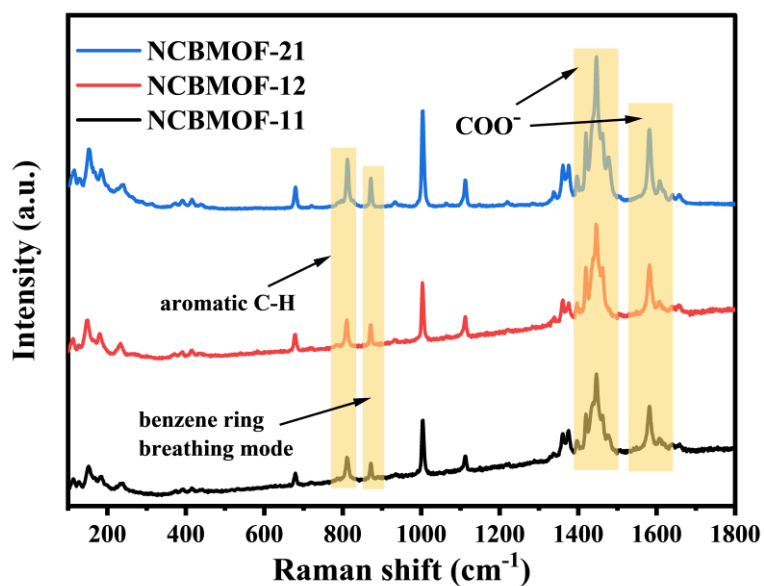

**Figure S17:** Raman spectra of NCBMOF-11, NCBMOF-12 and NCBMOF-21.

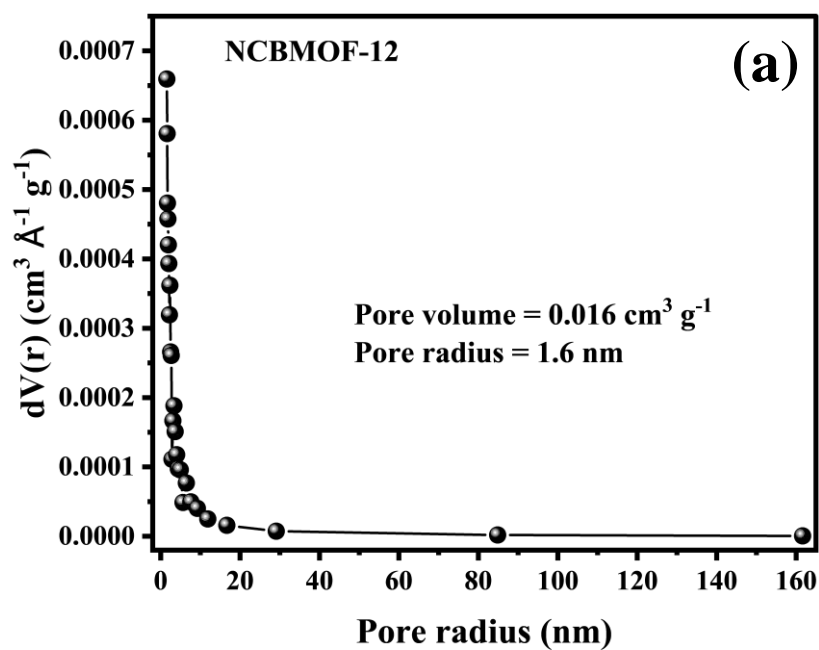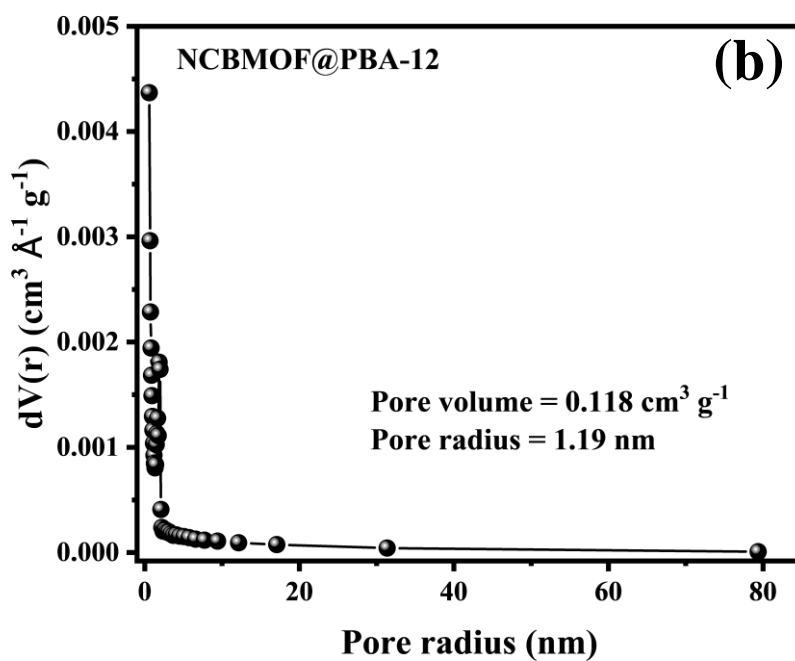

Figure S18: Pore size distribution plots of (a) NCBMOF-12 and (b) NCBMOF@PBA-12.

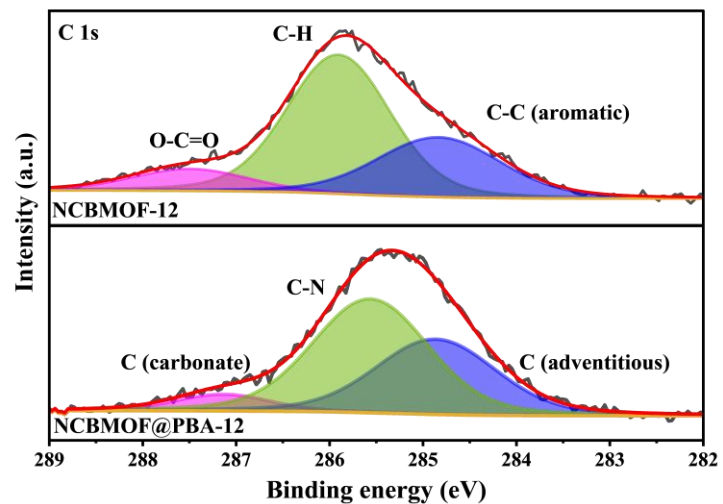

**Figure S19:** C 1s deconvoluted spectra of NCBMOF-12 and NCBMOF@PBA-12.

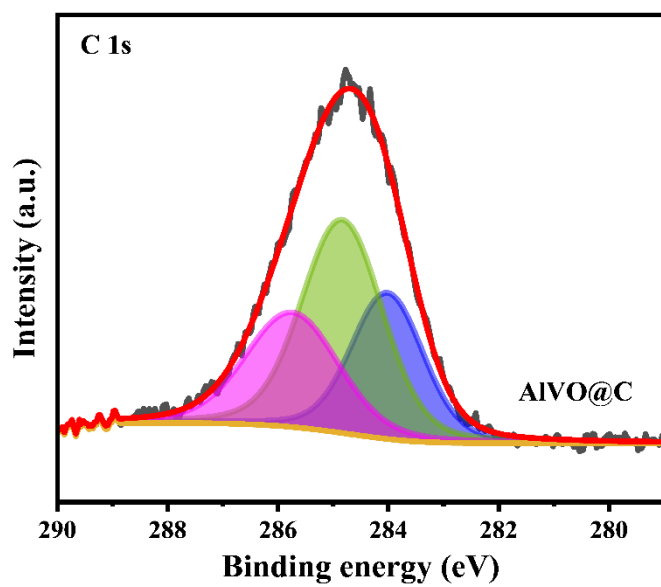

**Figure S20:** C 1s deconvoluted spectra of AlVO@C.

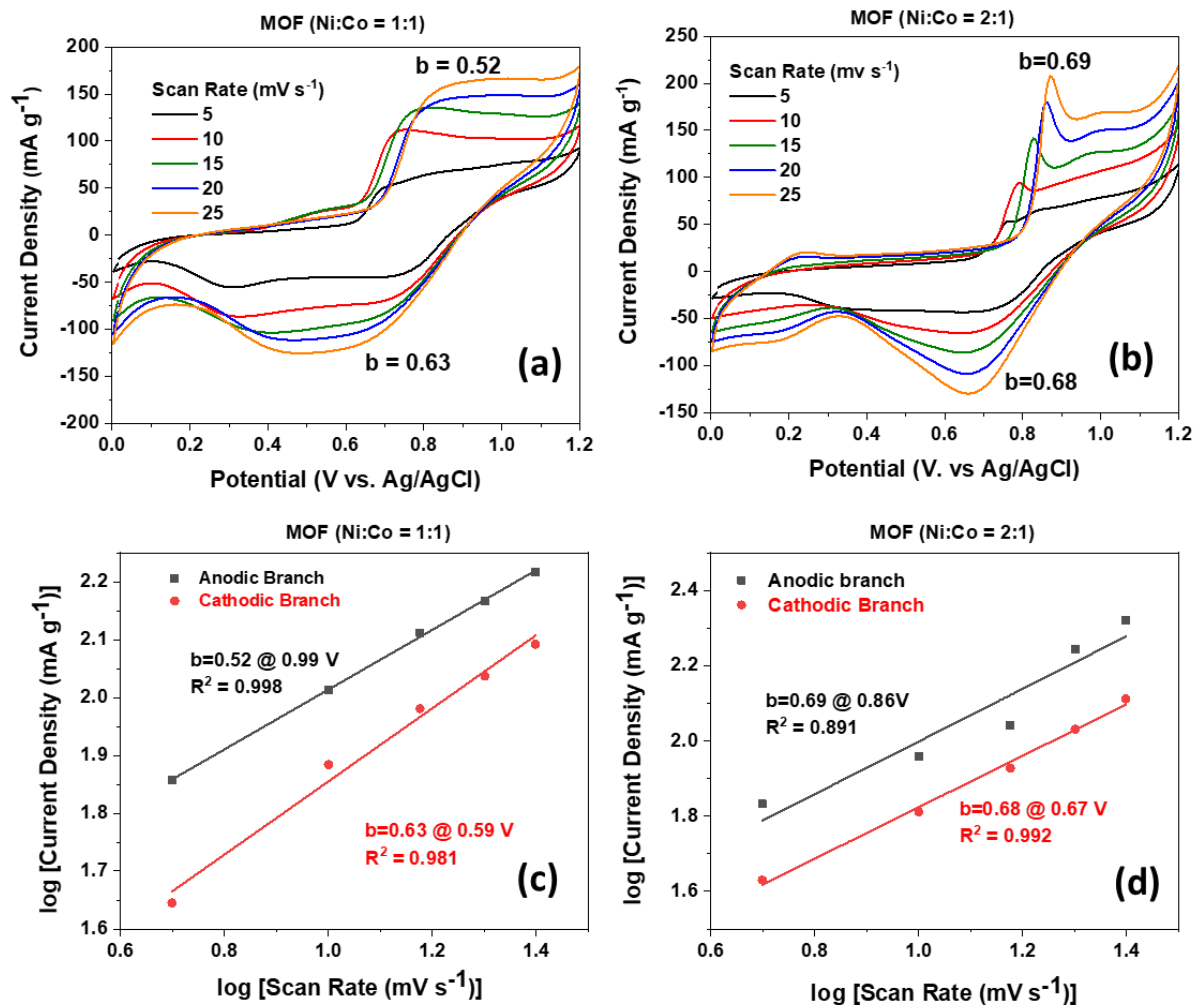

**Figure S21:** CV of (a) NCBMOF-11, (b) NCBMOF-21; b-value calculation of (c) NCBMOF-11, (d) NCBMOF-21.

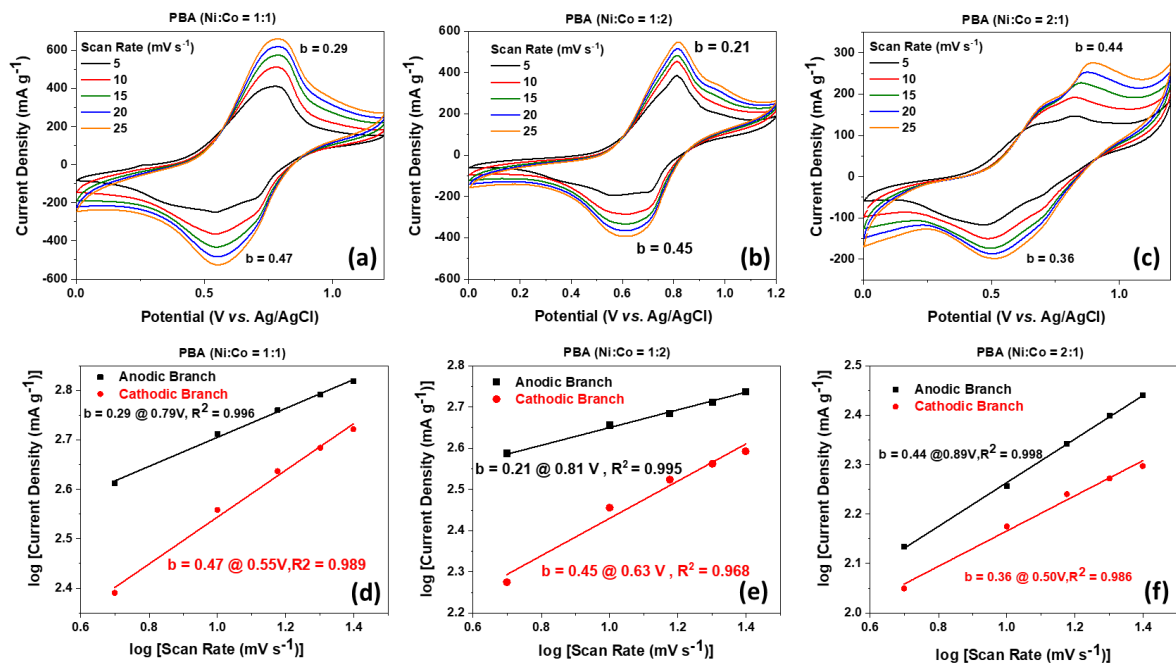

**Figure S22:** CV profiles of (a) PBA-11, (b) PBA-12, (c) PBA-21; b-value calculations for (d) PBA-11, (e) PBA-12, (f) PBA-21. In general, the b-value (from the relationship  $i = a \cdot v^b$ ) lies between 0.5 (diffusion-controlled process) and 1 (surface-controlled capacitive process). However, values lower than 0.5 can arise under certain non-ideal conditions. In the present case, the low b-values (0.21–0.47) observed for the PBA electrodes indicate a strongly diffusion-limited charge storage process with sluggish ion transport kinetics. [Ref: *Energy & Environmental Science*, 2014, 7, 1597–1614 & *J. Phys. Chem. C*, 2021, 125, 16946–16954]

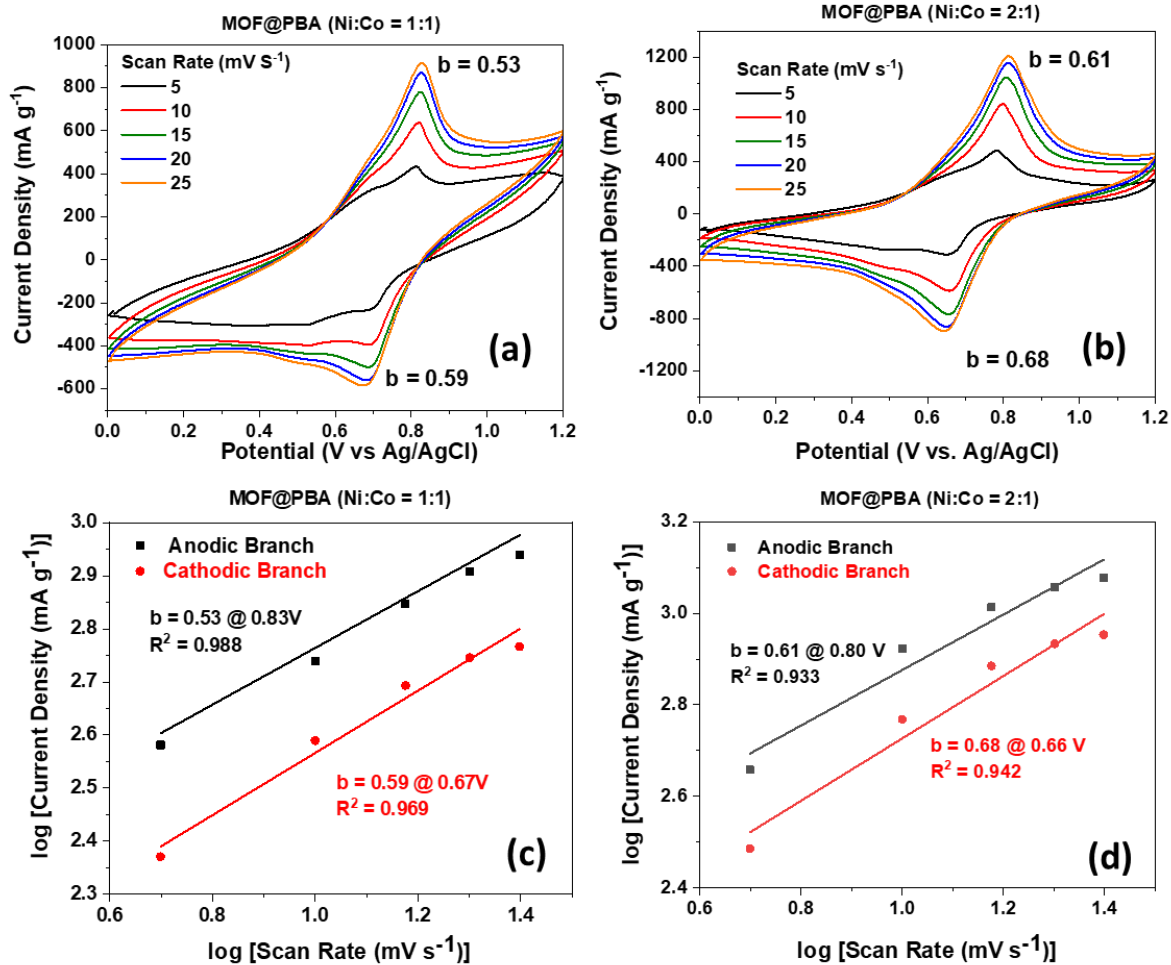

**Figure S23:** CV of (a) NCbMOF@PBA-11, (b) NCbMOF@PBA-21; b-value calculation of (c) NCbMOF@PBA-11, (d) NCbMOF@PBA-21.

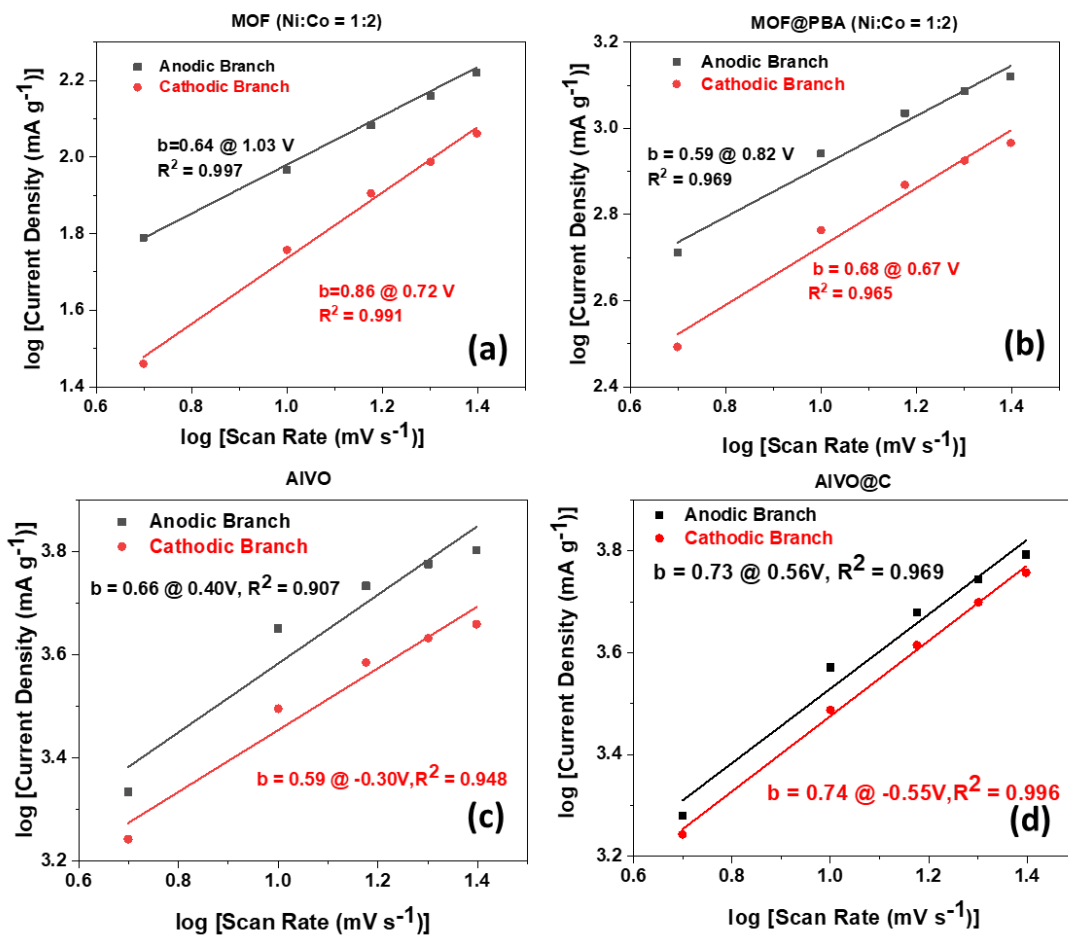

**Figure S24:** b-value calculation of (a) NCBMOF-12, (b) NCBMOF@PBA-12, (c) AIVO, and (d) AIVO@C.

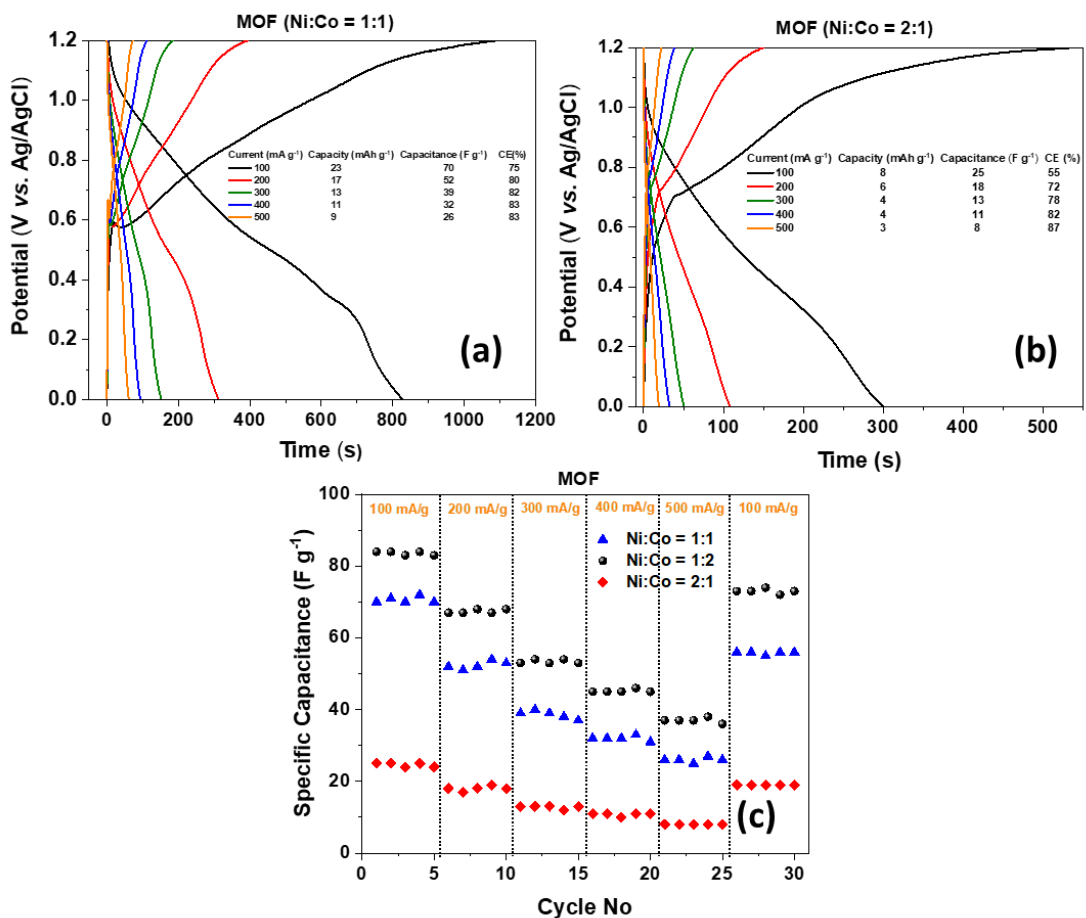

**Figure S25:** GCD of (a) NCBMOF-11, (b) NCBMOF-21, (c) comparison of rate capability among three compositions namely NCBMOF-11, NCBMOF-12 and NCBMOF-21.

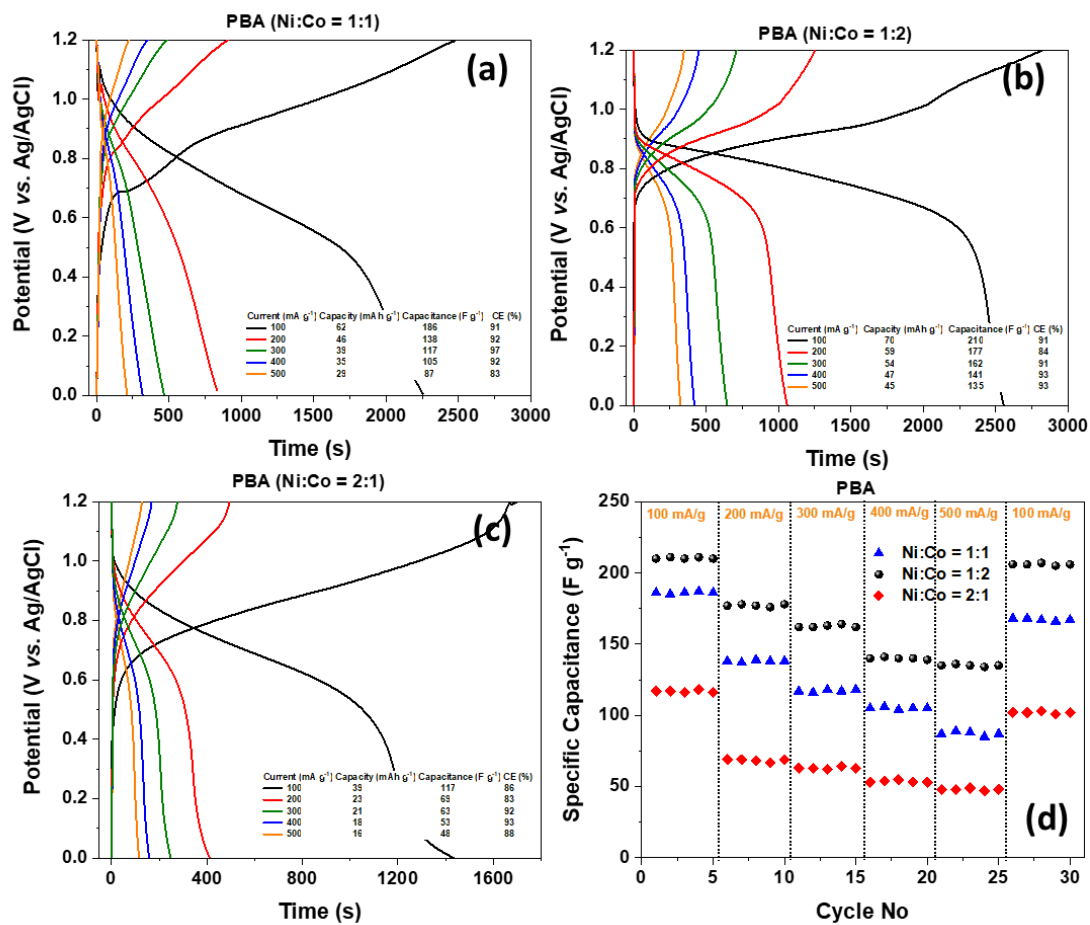

**Figure S26:** GCD of (a) PBA-11, (b) PBA-12, (c) PBA-21, (d) comparison of rate capability among three compositions.

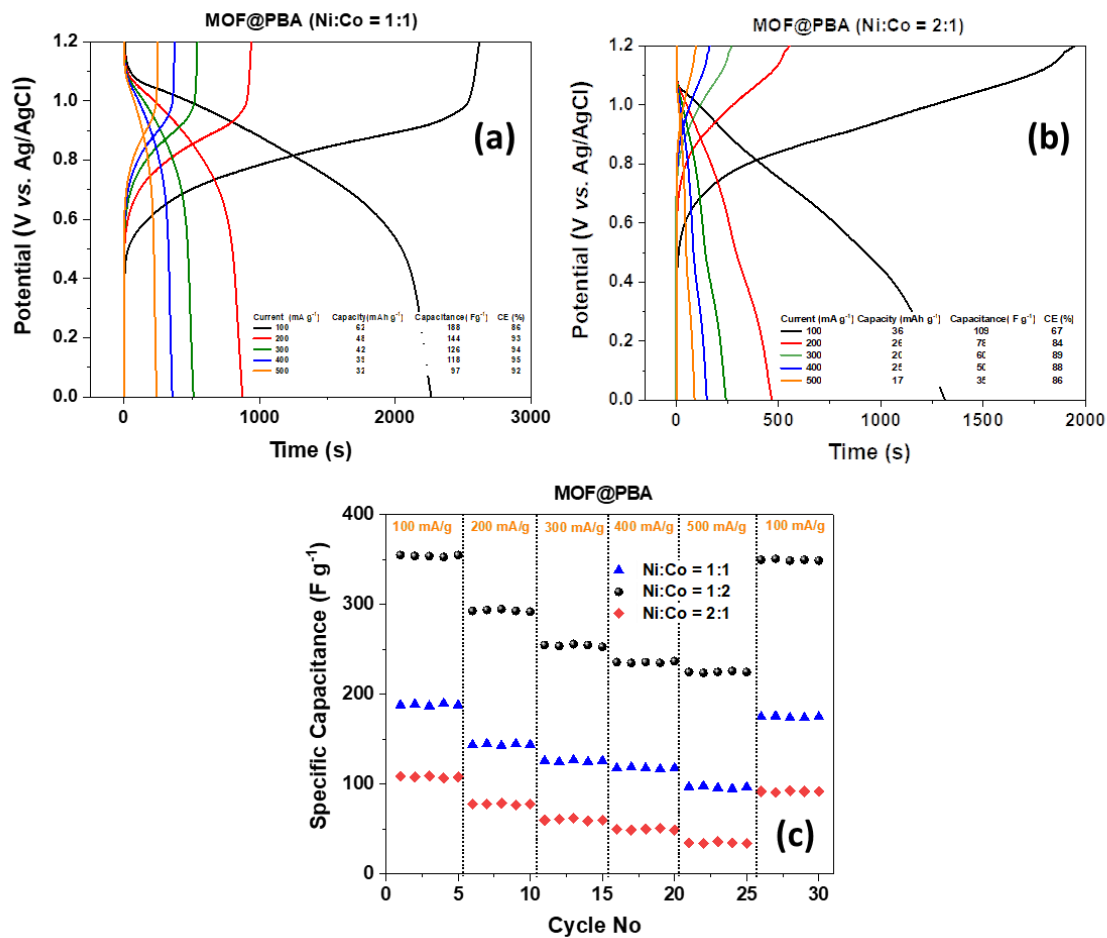

**Figure S27:** GCD of (a) NCBMOF@PBA-11, (b) NCBMOF@PBA-21, (c) comparison of rate capability among three compositions namely NCBMOF@PBA-11, NCBMOF@PBA-12 and NCBMOF@PBA-21.

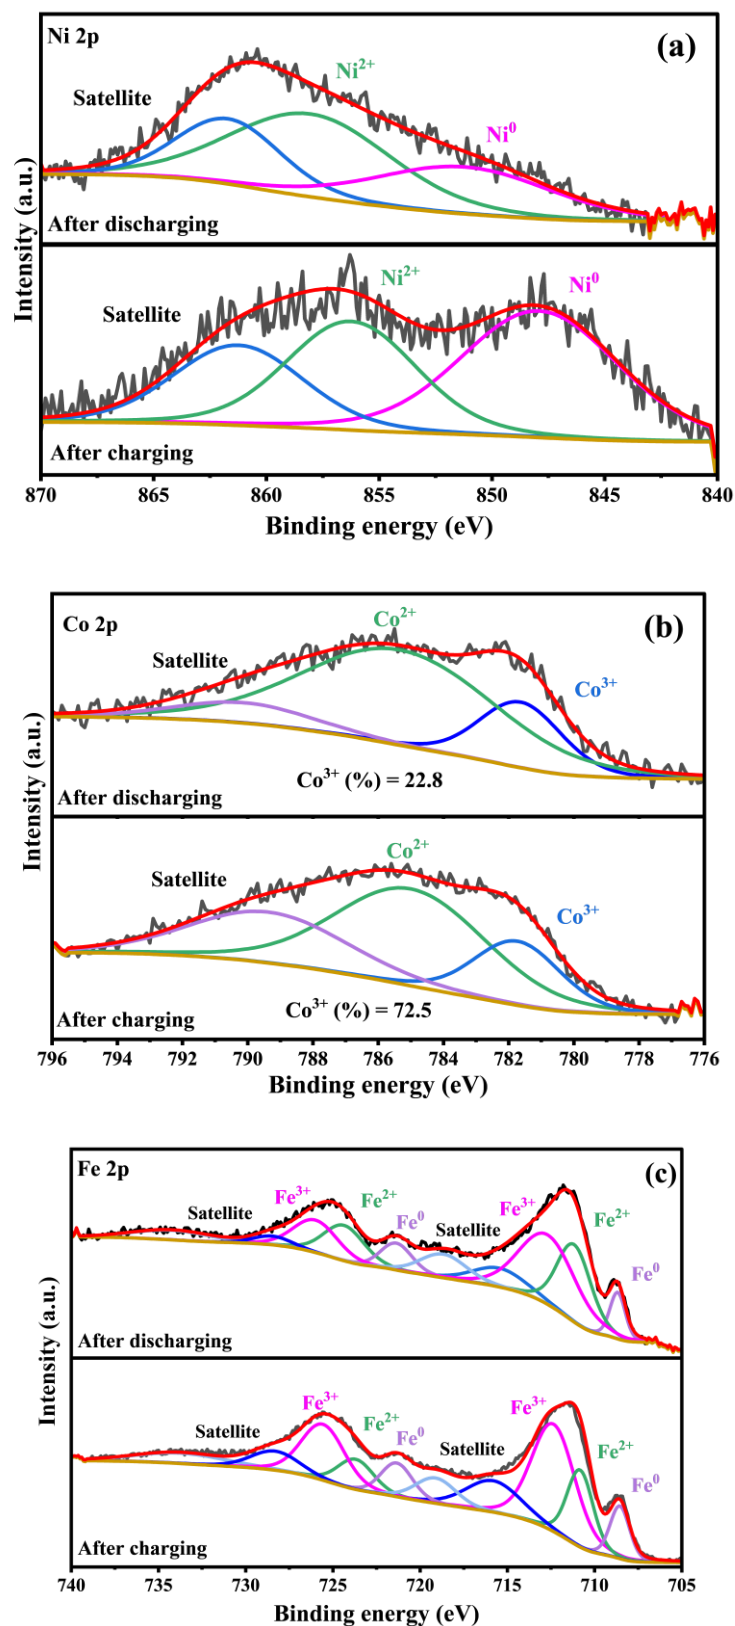

**Figure S28:** *ex situ* XPS analysis of NCBMOF@PBA-12 at its charged and discharged states: (a) Ni 2p, (b) Co 2p, and (c) Fe 2p spectra. Ni and Fe in metallic states are appeared from the stainless steel current collector.

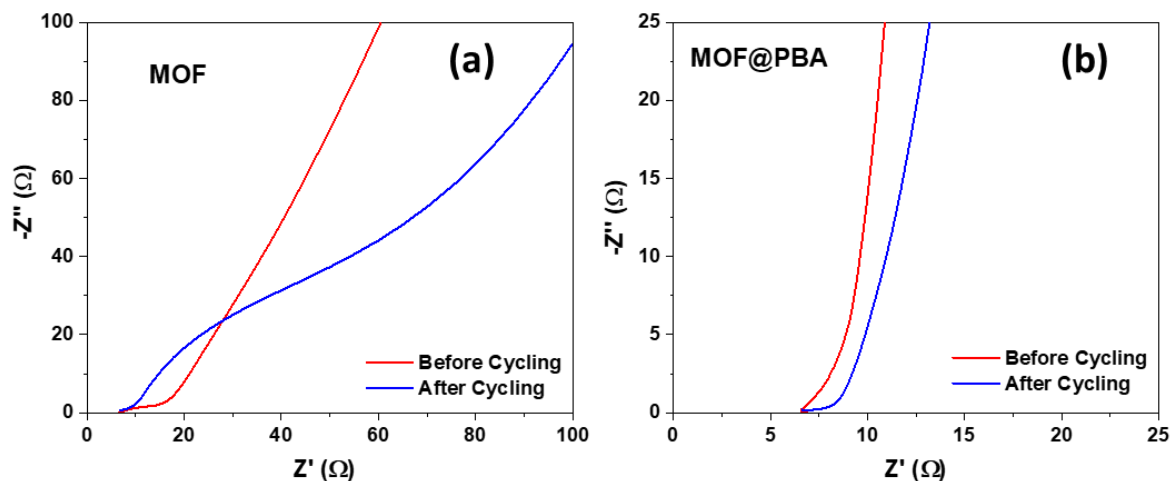

**Figure S29:** Nyquist plots at before and after cycling: (a) NCBMOF-12 and (b) NCBMOF@PBA-12.

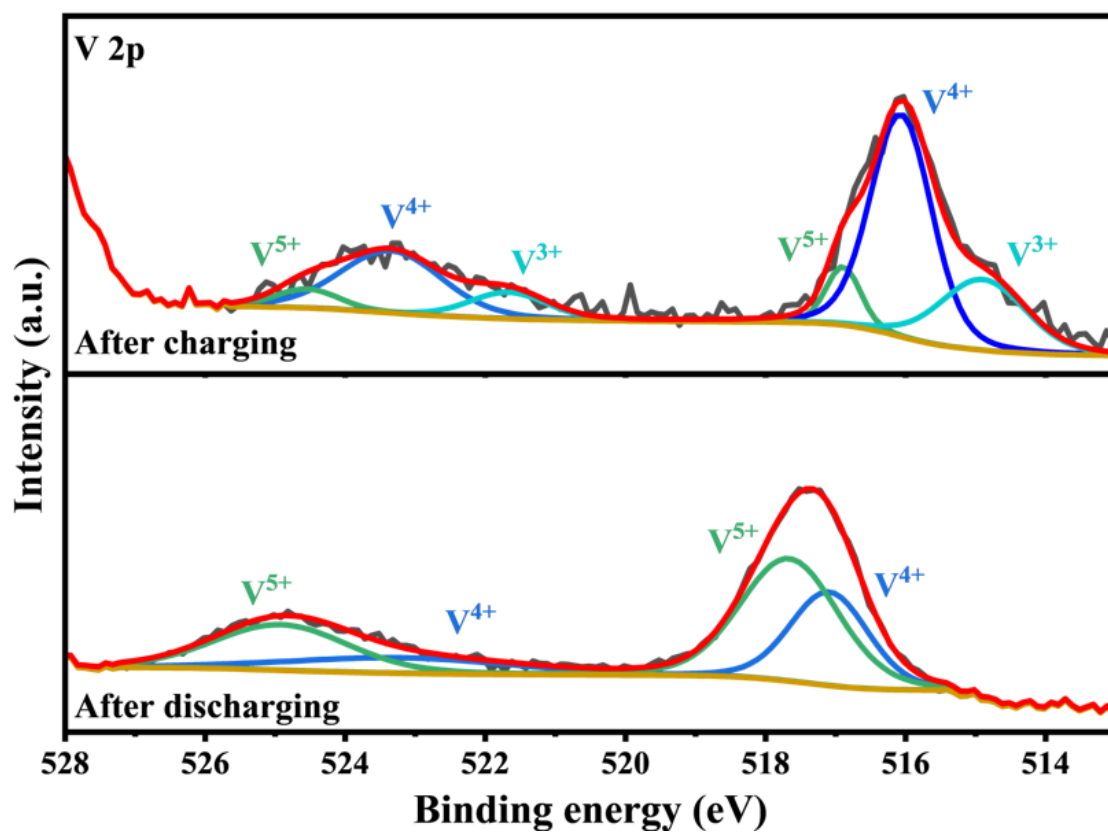

**Figure S30:** *ex situ* XPS analysis of AlVO@C at charged and discharged states, highlighting the V 2p spectra and corresponding changes in vanadium oxidation states during electrochemical cycling.

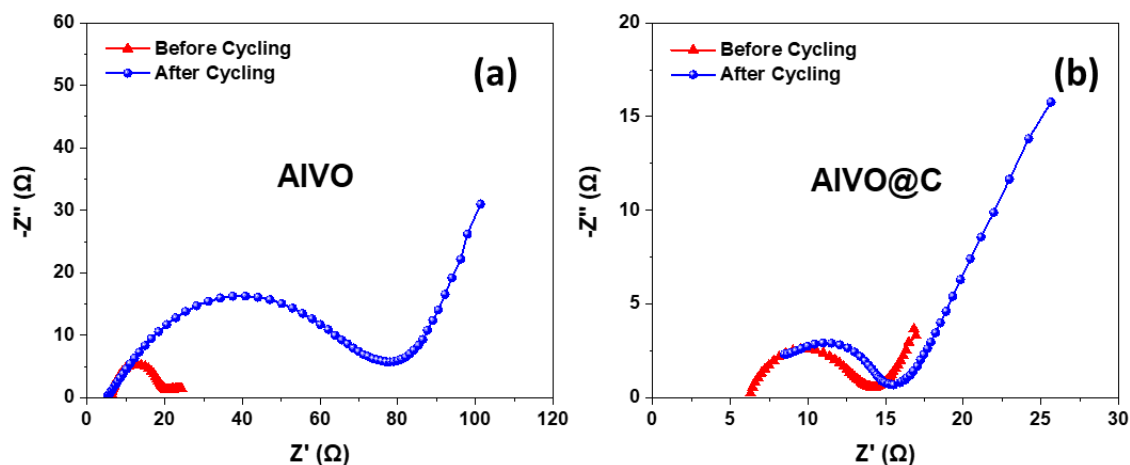

**Figure S31:** Nyquist plots at before and after cycling: (a) AIVO and (b) AIVO@C.

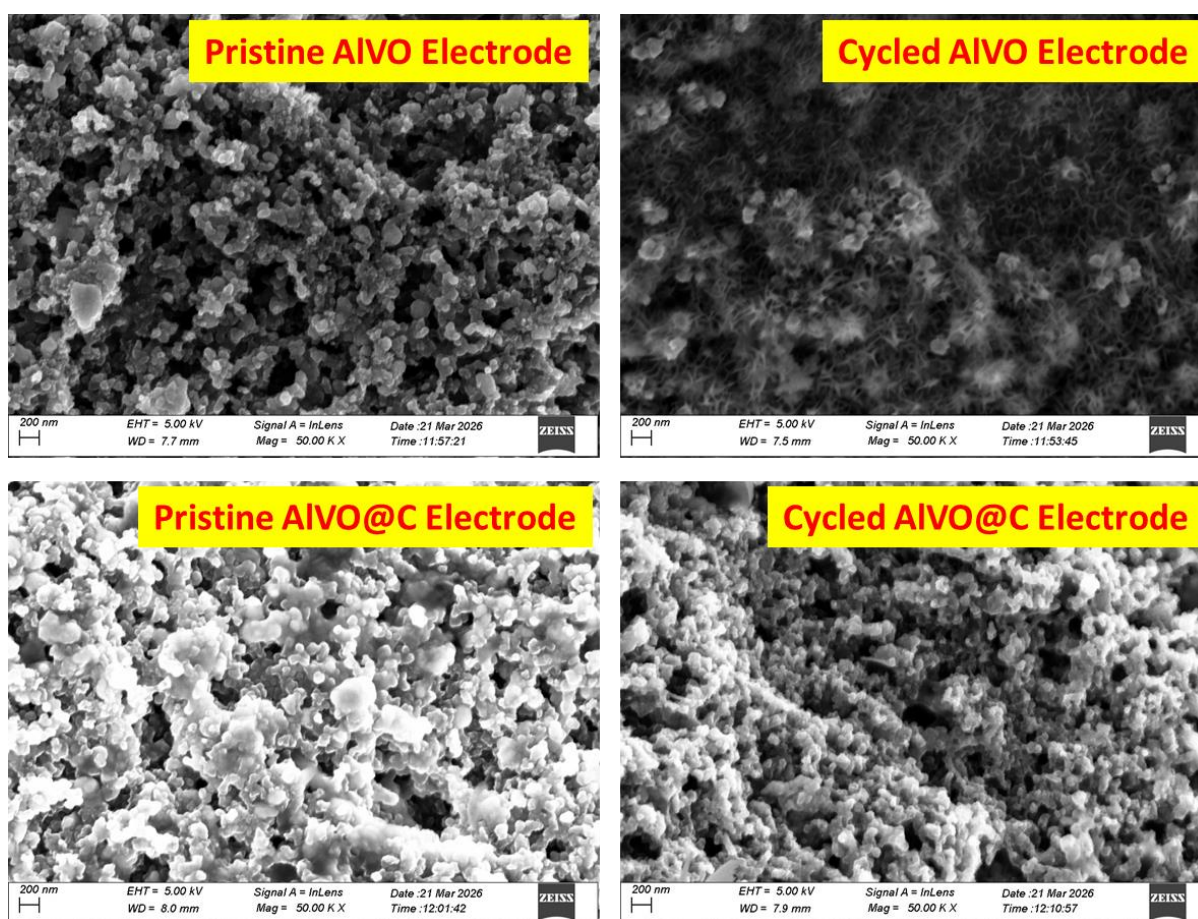

**Figure S32:** SEM images comparing the surface morphologies of AIVO and AIVO@C negative electrodes in their initial pristine state and after prolonged electrochemical cycling (50,000 CV at a scan rate of  $25 \text{ mV s}^{-1}$ ). The AIVO electrode exhibits significant morphological degradation after CV cycling,

including particle pulverization, surface roughening, and loss of structural integrity, which can be attributed to repeated volume expansion and contraction during  $\text{Zn}^{2+}$  insertion/extraction. In contrast, the AIVO@C electrode largely preserves its original morphology, maintaining particle integrity and surface uniformity even after extended cycling. This clear difference highlights the critical role of the carbon shell in buffering volume changes, stabilizing the electrode structure, and suppressing mechanical degradation.

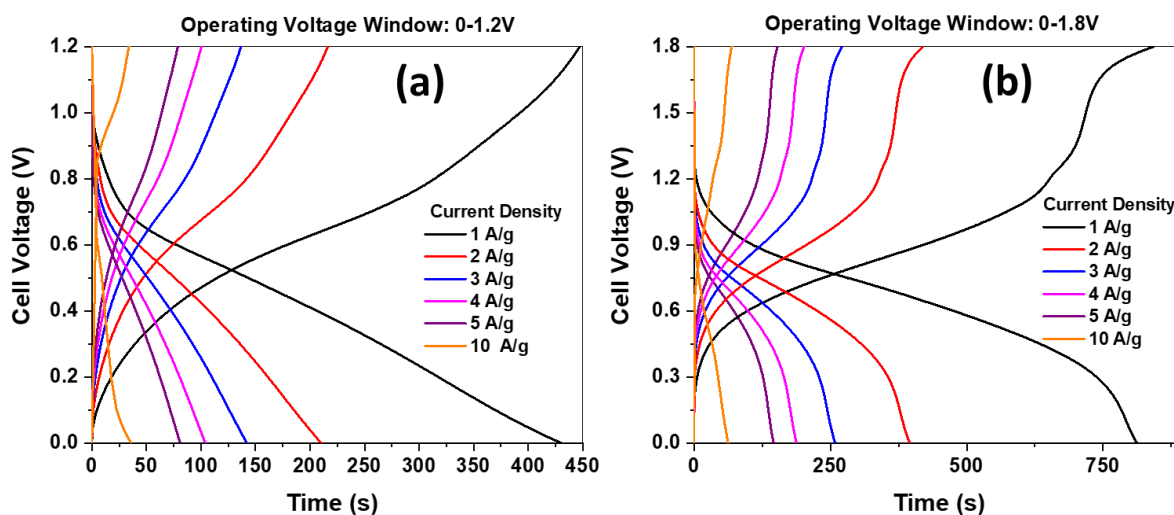

**Figure S33:** GCD profiles of the NCBMOF@PBA-12//AIVO@C full cells under (a) 0-1.2 V and (b) 0-1.8 V window.

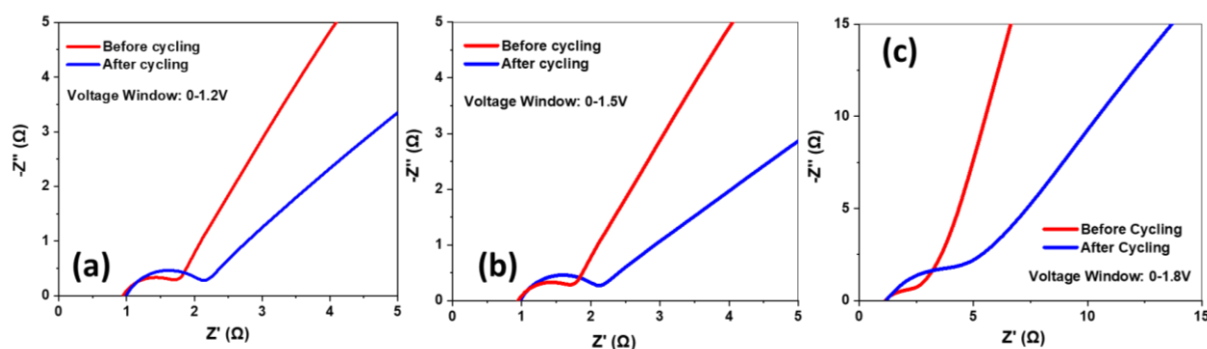

**Figure S34:** Nyquist plots at before and after full cell cycling at variable voltage regime: (a) 0-1.2 V, (b) 0-1.5 V, and (c) 0-1.8 V.

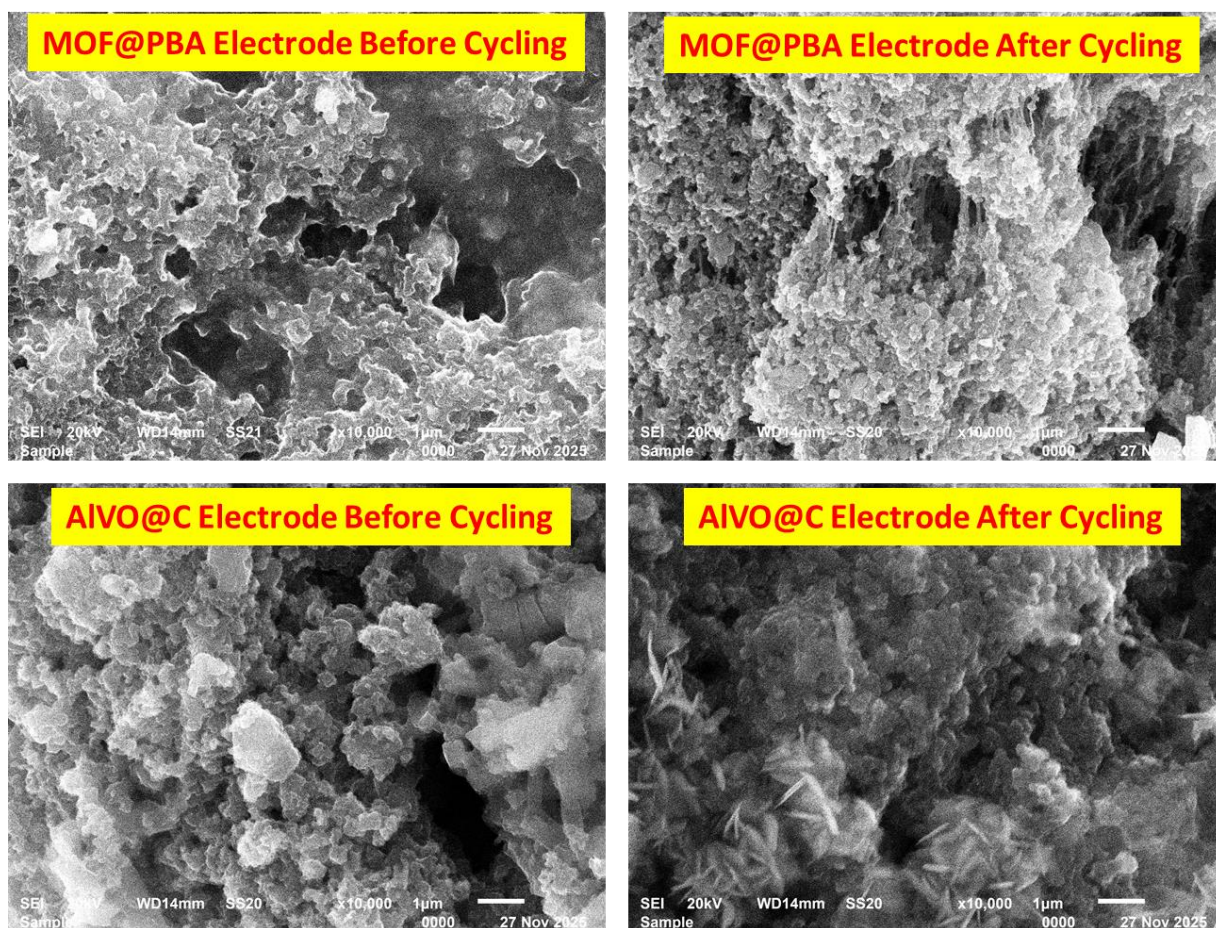

**Figure S35:** Surface morphology of NCBMOF@PBA-12 positive and AIVO@C negative electrodes at before and after cycling test @  $1 \text{ A g}^{-1}$ . All images are in 10,000X magnification; and Scale bar =  $1 \text{ }\mu\text{m}$ .

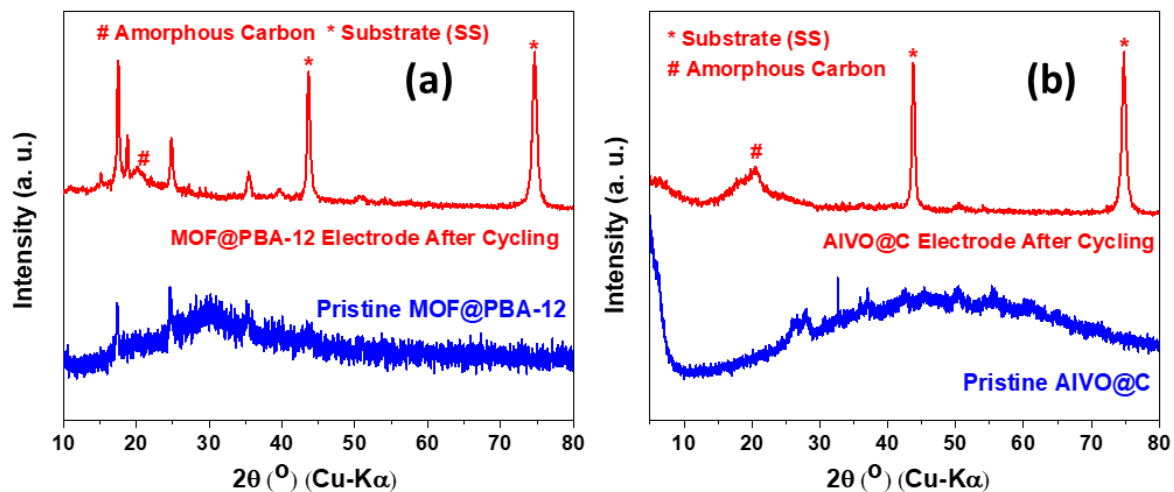

**Figure S36:** Comparative PXRD patterns of pristine active material and corresponding cycled electrodes (@ 1 A g<sup>-1</sup>): (a) NCBMOF@PBA-12 and (b) AIVO@C, showing structural stability after cycling.

## References

- S1. P. Naskar, B. Biswas, S. Laha and A. Banerjee, *Energy Adv.*, 2024, **3**, 1401.
- S2. P. Naskar, S. Mondal, B. Biswas, S. Laha and A. Banerjee, *J. Electrochem. Soc.*, 2023, **170**, 090535.
- S3. K. Wang *et al.*, *J. Alloy. Compd.*, 2022, **901**, 163588.
- S4. H. Li *et al.* *Chem. Eng. J.*, 2022, **428**, 131071.
- S5. Y. Shao *et al.* *Adv. Funct. Mater.*, 2020, **31**, 2007843.
- S6. F. Wei, H. F. Zhang, J. F. Wang, J. L. Zhuang and Y. H. Lv, *J. Alloy. Compd.*, 2022, **907**, 164536.
- S7. S. Wang *et al.* *Nanomicro Lett.*, 2019, **11**, 70.
- S8. Q. Yang *et al.* *ACS Nano*, 2019, **13**, 8275–8283.
- S9. Y. Jin *et al.* *Mater. Today Energy*, 2021, **19**, 100598.
- S10. Z. Huang *et al.* *Angew. Chem. Int. Ed. Engl.*, 2021, **60**, 1011–1021.
- S11. S. Zeng, X. Shi, D. Zheng, C. Yao, F. Wang, W. Xu and X. Lu, *Mater. Res. Bull.*, 2021, **135**, 111134.
- S12. H. Zhang, Z. Chen, Y. Zhang, Z. Ma, Y. Zhang, L. Bai and L. Sun, *J. Mater. Chem. A*, 2021, **9**, 16565
- S13. C. Leng, Z. Zhao, J. Guo, R. Li, X. Wang, J. Xiao, Y. V. Fedoseeva, L. G. Bulusheva and J. Qiu, *Chem. Commun.*, 2021, **57**, 8778.
- S14. F. Ji, S. Gou, J. Tang, Y. Xu, S. M. Eldin, W. Mai, J. Li and B. T. Liu, *Chem. Eng. J.*, 2023, **474**, No. 145786.
- S15. H. Ren, L. Zhang, J. Zhang, T. Miao, R. Yuan, W. Chen, Z. Wang, J. Yang and B. Zhao, *Carbon*, 2022, **198**, 46-56.
- S16. Y. Wang, J. Cao, J. Guo, J. Zhang, G. Liu, D. Wang, W. Si, J. Song, X. Meng and G. Wen, *J. Alloys Compd.*, 2022, **915**, 165418.
- S17. Z. Zou, H. Chen, Q. Li, Y. Wei, X. Zhang, X. Zou, X. Mei and J. Tao, *ACS Appl. Nano Mater.* 2024, **7**, 20645–20652.
